# Supplementary material
Source: publisher figshare collection journal article supplement (https://acs.figshare.com/ndownloader/files/4558051)
Supplement: Supplementary file 1 [file 4558051]

# Efficient Diastereoselective Synthesis of Trifarane-type Sesquiterpenes, Trifarienols A and B

Kazunori Takahashi, Ryuichi Akao, and Toshio Honda\*

*Faculty of Pharmaceutical Sciences, Hoshi University, Ebara 2-4-41, Shinagawa-ku,  
Tokyo 142-8501, Japan  
honda@hoshi.ac.jp*

## Supporting Information

|                                                                                                                                                                                                                                                                                          |     |
|------------------------------------------------------------------------------------------------------------------------------------------------------------------------------------------------------------------------------------------------------------------------------------------|-----|
| 1) General Experimental Procedures                                                                                                                                                                                                                                                       | S-2 |
| (3 <i>R</i> )-3-[(1 <i>S</i> , 4 <i>S</i> )-1,4-Dimethyl-2-oxocyclohexyl]butyl benzoate and (3 <i>S</i> )-3-[(1 <i>S</i> , 4 <i>S</i> )-1,4-Dimethyl-2-oxocyclohexyl]butyl benzoate ( <b>4</b> )                                                                                         | S-3 |
| (3 <i>R</i> )-3-{[(1 <i>S</i> , 4 <i>S</i> )-1,4-Dimethyl-2-(trimethylsilyl)oxy]cyclohex-2-en-1-yl}butyl benzoate and (3 <i>S</i> )-3-{[(1 <i>S</i> , 4 <i>R</i> )-1,4-Dimethyl-2-(trimethylsilyl)oxy]cyclohex-2-en-1-yl}butyl benzoate ( <b>5</b> ).                                    | S-3 |
| (3 <i>R</i> )-3-{(1 <i>S</i> )-1,4-Dimethyl-2-oxocyclohex-3-en-1-yl}butyl benzoate ( <b>6</b> )                                                                                                                                                                                          | S-4 |
| (3 <i>R</i> )-3-{(1 <i>S</i> , 4 <i>S</i> )-1,4-Dimethyl-2-oxo-4-vinylcyclohexyl}butyl benzoate and (3 <i>R</i> )-3-{(1 <i>S</i> , 4 <i>R</i> )-1,4-Dimethyl-2-oxo-4-vinylcyclohexyl}butyl benzoate ( <b>7</b> )                                                                         | S-4 |
| (3 <i>R</i> )-3-((1 <i>S</i> ,4 <i>R</i> )-1,4-dimethyl-2-{[(trifluoromethyl)sulfonyl]oxy}-4-vinylcyclohex-2-en-1-yl)butyl benzoate and (3 <i>R</i> )-3-((1 <i>S</i> ,4 <i>S</i> )-1,4-Dimethyl-2-{[(trifluoromethyl)sulfonyl]oxy}-4-vinylcyclohex-2-en-1-yl)butyl benzoate ( <b>8</b> ) | S-5 |
| 2) NMR spectra                                                                                                                                                                                                                                                                           |     |
| <sup>1</sup> H NMR Spectrum of <b>4</b>                                                                                                                                                                                                                                                  | S-7 |
| <sup>13</sup> C NMR Spectrum of <b>4</b>                                                                                                                                                                                                                                                 | S-8 |

|                                           |      |
|-------------------------------------------|------|
| <sup>1</sup> H NMR Spectrum of <b>5</b>   | S-9  |
| <sup>13</sup> C NMR Spectrum of <b>5</b>  | S-10 |
| <sup>1</sup> H NMR Spectrum of <b>6</b>   | S-11 |
| <sup>13</sup> C NMR Spectrum of <b>6</b>  | S-12 |
| <sup>1</sup> H NMR Spectrum of <b>7</b>   | S-13 |
| <sup>13</sup> C NMR Spectrum of <b>7</b>  | S-14 |
| <sup>1</sup> H NMR Spectrum of <b>8</b>   | S-15 |
| <sup>13</sup> C NMR Spectrum of <b>8</b>  | S-16 |
| <sup>1</sup> H NMR Spectrum of <b>9</b>   | S-17 |
| <sup>13</sup> C NMR Spectrum of <b>9</b>  | S-18 |
| <sup>1</sup> H NMR Spectrum of <b>10</b>  | S-19 |
| <sup>13</sup> C NMR Spectrum of <b>10</b> | S-20 |
| <sup>1</sup> H NMR Spectrum of <b>11</b>  | S-21 |
| <sup>13</sup> C NMR Spectrum of <b>11</b> | S-22 |
| <sup>1</sup> H NMR Spectrum of <b>12</b>  | S-23 |
| <sup>13</sup> C NMR Spectrum of <b>12</b> | S-24 |
| <sup>1</sup> H NMR Spectrum of <b>13</b>  | S-25 |
| <sup>13</sup> C NMR Spectrum of <b>13</b> | S-26 |
| <sup>1</sup> H NMR Spectrum of <b>14</b>  | S-27 |
| <sup>13</sup> C NMR Spectrum of <b>14</b> | S-28 |
| <sup>1</sup> H NMR Spectrum of <b>15</b>  | S-29 |
| <sup>13</sup> C NMR Spectrum of <b>15</b> | S-30 |
| <sup>1</sup> H NMR Spectrum of <b>16</b>  | S-31 |
| <sup>13</sup> C NMR Spectrum of <b>16</b> | S-32 |
| <sup>1</sup> H NMR Spectrum of <b>17</b>  | S-33 |
| <sup>13</sup> C NMR Spectrum of <b>17</b> | S-34 |
| NMR Spectrum of <b>1</b>                  | S-35 |
| <sup>13</sup> C NMR Spectrum of <b>1</b>  | S-36 |
| <sup>1</sup> H NMR Spectrum of <b>2</b>   | S-37 |
| <sup>13</sup> C NMR Spectrum of <b>2</b>  | S-38 |

**General Experimental Procedures.** Melting points were measured with a melting point

apparatus and are uncorrected. IR spectra were recorded as thin films on sodium chloride plates. Otherwise noted,  $^1\text{H}$  and  $^{13}\text{C}$  NMR spectra were obtained for solutions in  $\text{CDCl}_3$ , and chemical shifts are reported on the  $\delta$  scale using TMS as an internal standard of  $\delta$  0.00 for  $^1\text{H}$ -NMR spectra, and  $\text{CDCl}_3$  as an internal standard or  $\delta$  77.00 for  $^{13}\text{C}$  NMR spectra, respectively ( $^1\text{H}$ -NMR: 400 MHz,  $^{13}\text{C}$  NMR: 100 MHz). Reagents were purchased from commercial sources.

**(3R)-3-[(1S, 4S)-1,4-Dimethyl-2-oxocyclohexyl]butyl benzoate and (3S)-3-[(1S, 4S)-1,4-Dimethyl-2-oxocyclohexyl]butyl benzoate (4).**

To a stirred suspension of CuI (1.20 g, 6.51 mmol) in dry  $\text{Et}_2\text{O}$  (6 mL), was added MeLi (1.09 M  $\text{Et}_2\text{O}$  solution) (12 mL) (13 mmol) at  $-40\text{ }^\circ\text{C}$  under Ar, and the resulting mixture was stirred for 20 min. To this mixture was added a solution of enone **3** (620 mg, 2.17 mmol) in  $\text{Et}_2\text{O}$  (4 mL) at  $-78\text{ }^\circ\text{C}$ , and the whole was stirred at  $-40\text{ }^\circ\text{C}$  for further 1 h. After addition of saturated aq. ammonium chloride, the mixture was extracted with AcOEt. The extract was washed with brine and dried over  $\text{Na}_2\text{SO}_4$ . Evaporation of the solvent gave a residue, which was subjected to column chromatography on silica gel. Elution with *n*-hexane-AcOEt (7:1, v/v) afforded a diastereoisomeric mixture of ketone **4** (611 mg, 93%) as a colorless oil.

**(3R)-3-[(1S, 4S)-1,4-Dimethyl-2-oxocyclohexyl]butyl benzoate (major):** IR  $\nu_{\text{max}}$  2954, 1720, 1704  $\text{cm}^{-1}$ ;  $^1\text{H}$ -NMR ( $\text{CDCl}_3$ ; 400 MHz)  $\delta$  8.01-8.05 (2H, m), 7.54-7.58 (1H, m), 7.42-7.46 (2H, m), 4.28-4.36 (2H, m), 2.25-2.32 (2H, m), 2.13-2.20 (1H, m), 2.02-2.07 (1H, m), 1.71-1.81 (1H, m), 1.29-1.65 (5H, m), 0.97 (3H, d,  $J=6.6$  Hz), 0.95 (3H, d,  $J=6.4$  Hz), 0.89 (3H, s);  $^{13}\text{C}$ -NMR ( $\text{CDCl}_3$ ; 100 MHz)  $\delta$  216.0, 166.4, 132.9, 130.1, 129.4 (2), 128.3 (2), 63.3, 51.3, 46.8, 36.4, 35.5, 31.5, 30.8, 28.8, 22.2, 16.21, 12.3; MS (EI): 302 ( $\text{M}^+$ ); HRMS (EI): Calcd for  $\text{C}_{19}\text{H}_{26}\text{O}_3$ : 302.1882. Found: 302.1904.

**(3R)-3-[(1S, 4S)-1,4-Dimethyl-2-oxocyclohexyl]butyl benzoate (minor):**  $^1\text{H}$ -NMR ( $\text{CDCl}_3$ ; 400 MHz)  $\delta$  8.01-8.05 (2H, m), 7.54-7.58 (1H, m), 7.42-7.76 (2H, m), 4.38-4.43 (2H, m), 2.25-2.32 (2H, m), 2.13-2.20 (1H, m), 2.02-2.07 (1H, m), 1.71-1.81 (1H, m), 1.57-1.65 (1H, m), 1.29-1.50 (4H, m), 0.99 (3H, d,  $J=5.9$  Hz), 0.94 (3H, d,  $J=6.7$  Hz), 0.89 (3H, s);  $^{13}\text{C}$ -NMR ( $\text{CDCl}_3$ ; 100 MHz)  $\delta$  215.5, 166.4, 132.8, 130.3, 129.5 (2), 128.3 (2), 64.0, 50.9, 46.4, 33.8, 33.3, 32.7, 30.7, 28.5, 21.2, 19.7, 14.3.

**(3R)-3-[(1S, 4S)-1,4-Dimethyl-2-(trimethylsilyloxy)-cyclohex-2-en-1-yl]butyl benzoate and (3R)-3-[(1S, 4R)-1,4-Dimethyl-2-(trimethylsilyloxy)-cyclohex-2-en-1-yl]butyl benzoate (5).**

To a stirred solution of (3R)-ketone **4** (6.8 g, 22.5 mmol) in  $\text{CH}_2\text{Cl}_2$  (140 mL) were added  $\text{Et}_3\text{N}$  (53 mL, 225 mmol) and TMSOTf (16.3 mL, 90 mmol) at  $0\text{ }^\circ\text{C}$  under Ar, and the resulting mixture was stirred for further 30 min at rt. After treatment with saturated aq.  $\text{NaHCO}_3$  at  $0\text{ }^\circ\text{C}$ , the mixture was extracted with  $\text{Et}_2\text{O}$ -pentane (1:1, v/v). The extract was washed with brine and dried over  $\text{MgSO}_4$ .

Evaporation of the solvent gave a residue, which was purified by column chromatography on silica gel. Elution with *n*-hexane-AcOEt (20:1, v/v) afforded silyl enol ether **5** (7.9 g, 94%) as a colorless oil.

**(3R)-3-[(1S, 4S)-1,4-Dimethyl-2-(trimethylsilyloxy)-cyclohex-2-en-1-yl]butyl benzoate (major):**

IR  $\nu_{\text{max}}$  2959, 1724, 1653  $\text{cm}^{-1}$ ;  $^1\text{H-NMR}$  ( $\text{CDCl}_3$ ; 400 MHz)  $\delta$  8.01-8.06 (2H, m), 7.53-7.57 (1H, m), 7.41-7.46 (2H, m), 4.66 (1H, d,  $J=4.8$  Hz), 4.40-4.46 (1H, m), 4.25-4.35 (1H, m), 2.21-2.27 (1H, m), 1.90-2.07 (1H, m), 1.77-1.89 (1H, m), 1.63-1.75 (1H, m), 1.20-1.47 (3H, m), 1.11-1.16 (1H, m), 1.05 (3H, s), 0.96 (3H, d,  $J=7.0$  Hz), 0.91 (3H, d,  $J=6.7$  Hz), 0.17 (9H, s);  $^{13}\text{C-NMR}$  ( $\text{CDCl}_3$ ; 100 MHz)  $\delta$  166.7, 155.2, 132.7, 130.6, 129.5 (2), 128.3 (2), 108.6, 64.6, 40.9, 35.3, 29.9, 28.73, 26.7, 26.3, 23.8, 21.7, 15.2, 0.3 (3); MS (EI): 374 ( $\text{M}^+$ ); HRMS (EI): Calcd for  $\text{C}_{22}\text{H}_{34}\text{O}_3\text{Si}$ : 374.2277. Found: 374.2298.

**(3R)-3-[(1S, 4R)-1,4-Dimethyl-2-(trimethylsilyloxy)cyclohex-2-en-1-yl]butyl benzoate (minor):**

$^1\text{H-NMR}$  ( $\text{CDCl}_3$ ; 400 MHz)  $\delta$  8.01-8.06 (2H, m), 7.53-7.57 (1H, m), 7.41-7.46 (2H, m), 4.52 (1H, s), 4.40-4.46 (1H, m), 4.24-4.35 (1H, m), 2.21-2.27 (1H, m), 1.90-2.07 (1H, m), 1.77-1.89 (1H, m), 1.63-1.75 (1H, m), 1.20-1.47 (3H, m), 1.11-1.16 (1H, m), 1.07 (3H, s), 0.93 (3H, d,  $J=6.9$  Hz), 0.91 (3H, d,  $J=6.7$  Hz), 0.17 (9H, m);  $^{13}\text{C-NMR}$  ( $\text{CDCl}_3$ , 100 MHz)  $\delta$  166.7, 155.2, 132.7, 130.6, 129.5 (2), 128.3 (2), 109.7, 64.5, 40.9, 35.5, 30.4, 29.7, 26.7, 26.3, 24.1, 22.9, 14.7, 0.3 (3).

**(3R)-3-[(1S)-1,4-Dimethyl-2-oxocyclohex-3-en-1-yl]butyl benzoate (6).**

To a stirred solution of silyl enol ether **5** (124 mg, 0.332 mmol) in dry DMSO (2 mL) was added  $\text{Pd}(\text{OAc})_2$  (30 mg, 0.133 mmol) at rt, and the mixture was stirred at 80 °C for 20 h under an atmospheric pressure of oxygen. The mixture was treated with  $\text{H}_2\text{O}$  and extracted with AcOEt. The extract was washed with brine and dried over  $\text{MgSO}_4$ . Evaporation of the solvent gave a residue, which was purified by column chromatography on silica gel. Elution with *n*-hexane-AcOEt (5:1, v/v) afforded enone **6** (74.9 mg, 75%) as a pale yellowish oil:  $[\alpha]_{\text{D}}^{22} = +18.3$  (c 0.6,  $\text{CHCl}_3$ ); mp 71-73 °C; IR  $\nu_{\text{max}}$  2965, 1719, 1663, 1276  $\text{cm}^{-1}$ ;  $^1\text{H-NMR}$  ( $\text{CDCl}_3$ ; 400 MHz)  $\delta$  7.99-8.02 (2H, m), 7.53-7.57 (1H, m), 7.41-7.44 (2H, m), 5.77 (1H, d,  $J=1.3$  Hz), 4.23-4.38 (2H, m), 1.99-2.35 (4H, m), 1.88 (3H, s), 1.82-1.89 (1H, m), 1.66-1.73 (1H, m), 1.34-1.43 (1H, m), 1.01 (3H, s), 0.97 (3H, d,  $J=6.8$  Hz);  $^{13}\text{C-NMR}$  ( $\text{CDCl}_3$ ; 100 MHz)  $\delta$  204.1, 166.5, 159.9, 132.8, 130.3, 129.5 (2), 128.2 (2), 125.4, 63.7, 46.4, 32.3, 30.8, 30.1, 27.9, 23.7, 18.0, 14.6; MS (EI): 300 ( $\text{M}^+$ ); HRMS (EI): Calcd for  $\text{C}_{19}\text{H}_{24}\text{O}_3$ : 300.1725. Found: 300.1748. Anal. Calcd for  $\text{C}_{19}\text{H}_{24}\text{O}_3$ : C, 75.97; H, 8.05. Found: C, 75.98, H, 8.17.

**(3R)-3-[(1S, 4S)-4-Ethenyl-1,4-dimethyl-2-oxocyclohexyl]butyl benzoate and (3R)-3-[(1S, 4R)-4-Ethenyl-1,4-dimethyl-2-oxocyclohexyl]butyl benzoate (7).** Vinylmagnesium bromide (1.0 M THF solution) (22 mL, 22 mmol) was added lithium-2-thienylcyanocuprate (0.25 M THF solution) (44 mL, 11.0 mmol) at -78 °C under Ar, and the whole was stirred at 0 °C for 30 min. The mixture was cooled to -78 °C, and a solution of enone **6** (1.1 g, 3.67 mmol) in THF (18 mL) was added to the mixture

at the same temperature, and stirred at -40 °C for 12 h. After treatment with saturated aq. ammonium chloride, the mixture was extracted with AcOEt. The organic layer was washed with brine and dried over Na<sub>2</sub>SO<sub>4</sub>. Evaporation of the solvent gave a residue, which was subjected to column chromatography on silica gel. Elution with *n*-hexane-AcOEt (9:1, v/v) afforded ketone **7** (1.1 g, 90%) as a colorless oil.

**(3R)-3-((1S, 4S)-4-Ethenyl-1,4-dimethyl-2-oxocyclohexyl)butyl benzoate (major):** IR  $\nu_{\text{max}}$  2966, 1719, 1704, 1274 cm<sup>-1</sup>; <sup>1</sup>H-NMR (CDCl<sub>3</sub>; 400 MHz)  $\delta$  8.00-8.03 (2H, m), 7.52-7.58 (1H, m), 7.41-7.46 (2H, m), 5.72 (1H, dd, *J*=17.5 and 10.8 Hz), 4.92 (1H, dd, *J*=10.8 and 0.71 Hz), 4.88 (1H, dd, *J*=17.5 and 0.71 Hz), 4.28-4.39 (2H, m), 2.60 (1H, d, *J*=13.8 Hz), 2.19-2.29 (1H, m), 2.15 (1H, dd, *J*=12.2 and 1.5 Hz), 1.91-1.97 (1H, m), 1.78-1.85 (1H, m), 1.41-1.66 (4H, m), 1.00 (3H, s), 0.97 (3H, s), 0.96 (3H, d, *J*=6.6 Hz); <sup>13</sup>C-NMR (CDCl<sub>3</sub>; 100MHz)  $\delta$  215.4, 166.5, 146.9, 132.9, 130.2, 129.5 (2), 128.4 (2), 111.2, 63.4, 51.1, 48.6, 41.8, 32.3, 31.8, 31.5, 30.7, 25.3, 18.0, 13.2; MS (EI): 328 (M<sup>+</sup>); HRMS (EI): Calcd for C<sub>21</sub>H<sub>28</sub>O<sub>3</sub>: 328.2038. Found: 328.2044.

**(3R)-3-((1S, 4R)-4-Ethenyl-1,4-dimethyl-2-oxocyclohexyl)butyl benzoate (minor):** <sup>1</sup>H-NMR (CDCl<sub>3</sub>; 400 MHz)  $\delta$  8.00-8.03 (2H, m), 7.52-7.58 (1H, m), 7.41-7.46 (2H, m), 5.63 (1H, dd, *J*=17.5 and 11.0 Hz), 5.02 (1H, dd, *J*=11.0 and 0.71 Hz), 4.99 (1H, dd, *J*=17.5 and 0.71 Hz), 4.28-4.39 (2H, m), 2.60 (1H, d, *J*=13.8 Hz), 2.19- 2.41 (1H, m), 2.15 (1H, dd, *J*=12.2 and 1.5 Hz), 1.91-1.97 (1H, m), 1.78-1.85 (1H, m), 1.58-1.66 (1H, m), 1.41-1.54 (3H, m), 0.96 (3H, d, *J*=6.6 Hz), 0.89 (3H, s), 0.89 (3H, s); <sup>13</sup>C-NMR (CDCl<sub>3</sub>; 100MHz)  $\delta$  215.4, 166.5, 146.9, 132.9, 130.2, 129.5 (2), 128.4 (2), 111.2, 63.4, 51.1, 48.6, 41.8, 32.3, 31.8, 31.5, 30.7, 25.3, 18.0, 13.2.

**(3R)-3-((1S,4R)-4-Ethenyl-1,4-dimethyl-2-(((trifluoromethyl)sulfonyl)oxy)-cyclohex-2-en-1-yl)butyl benzoate and (3R)-3-((1S,4S)-4-Ethenyl-1,4-dimethyl-2-(((trifluoromethyl)sulfonyl)oxy)-cyclohex-2-en-1-yl)butyl benzoate (8).**

To a stirred solution of ketone **7** (158 mg, 0.482 mmol) and Comins reagent (284 mg, 0.723 mmol) in THF (2.4 mL) was gradually added NaHMDS (1.9 M THF solution) (0.3 ml, 0.578 mmol) at -40 °C, and the resulting mixture was stirred at the same temperature for further 12 h. After treatment with saturated aq. ammonium chloride, the mixture was extracted with AcOEt. The organic layer was washed with brine and dried over Na<sub>2</sub>SO<sub>4</sub>. Evaporation of the solvent gave a residue, which was subjected to column chromatography on silica gel. Elution with *n*-hexane-AcOEt (95:5, v/v) afforded triflate **8** (153 mg, 69%) as a colorless oil.

**(3R)-3-((1S,4R)-4-Ethenyl-1,4-dimethyl-2-(((trifluoromethyl)sulfonyl)oxy)-cyclohex-2-en-1-yl)butyl benzoate (major):** IR  $\nu_{\text{max}}$  2968, 1721, 1453 cm<sup>-1</sup>; <sup>1</sup>H-NMR (CDCl<sub>3</sub>; 400 MHz)  $\delta$  8.01-8.03 (2H, m), 7.49-7.55 (1H, m), 7.40-7.44 (2H, m), 5.72 (1H, dd, *J*=17.4 and 10.6 Hz), 5.51 (1H, s), 5.05 (1H, dd, *J*=10.6 and 1.1 Hz), 4.95 (1H, dd, *J*=17.4 and 1.1 Hz), 4.41-4.47 (1H, m), 4.21-4.28 (1H, m), 1.83-2.01

(2H, m), 1.69-1.77 (1H, m), 1.52-1.55 (2H, m), 1.25-1.42 (2H, m), 1.23 (3H, s), 1.15 (3H, s), 0.95 (3H, d,  $J=6.7$  Hz);  $^{13}\text{C}$ -NMR ( $\text{CDCl}_3$ ; 100 MHz)  $\delta$  166.4, 154.8, 144.7, 132.8, 130.2, 129.4 (2), 128.3 (2), 123.1, 118.3 (q), 114.2, 63.5, 41.5, 40.3, 35.6, 31.4, 29.4, 28.7, 26.8, 23.1, 14.6; MS (CI): 461 ( $\text{M}+1$ )<sup>+</sup>, HRMS (CI): Calcd for  $\text{C}_{22}\text{H}_{27}\text{O}_5\text{F}_3\text{S}+\text{H}$ : 461.1609. Found: 461.1628.

**(3R)-3-((1S,4S)-4-Ethenyl-1,4-dimethyl-2-[[trifluoromethyl)sulfonyl]oxy]-cyclohex-2-en-1-yl)butyl benzoate (minor):**  $^1\text{H}$ -NMR ( $\text{CDCl}_3$ ; 400 MHz)  $\delta$  8.01-8.03 (2H, m), 7.49-7.55 (1H, m), 7.40-7.44 (2H, m), 5.77 (1H, dd,  $J=17.4$  and 10.6 Hz), 5.57 (1H, s), 5.05 (1H, dd,  $J=17.4$  and 1.1 Hz), 4.95 (1H, dd,  $J=10.6$  and 1.1 Hz), 4.41-4.47 (1H, m), 4.21-4.28 (1H, m), 1.83-2.01 (2H, m), 1.69-1.77 (1H, m), 1.52-1.55 (2H, m), 1.25-1.42 (2H, m), 1.20 (3H, s), 1.14 (3H, s), 0.99 (3H, d,  $J=6.8$  Hz);  $^{13}\text{C}$ -NMR ( $\text{CDCl}_3$ ; 100 MHz)  $\delta$  166.4, 154.2, 145.8, 132.0, 130.2, 129.9 (2), 128.7 (2), 124.1, 118.3 (q), 112.5, 68.0, 41.3, 39.6, 35.3, 31.6, 29.9, 29.6, 27.4, 25.8, 14.9.

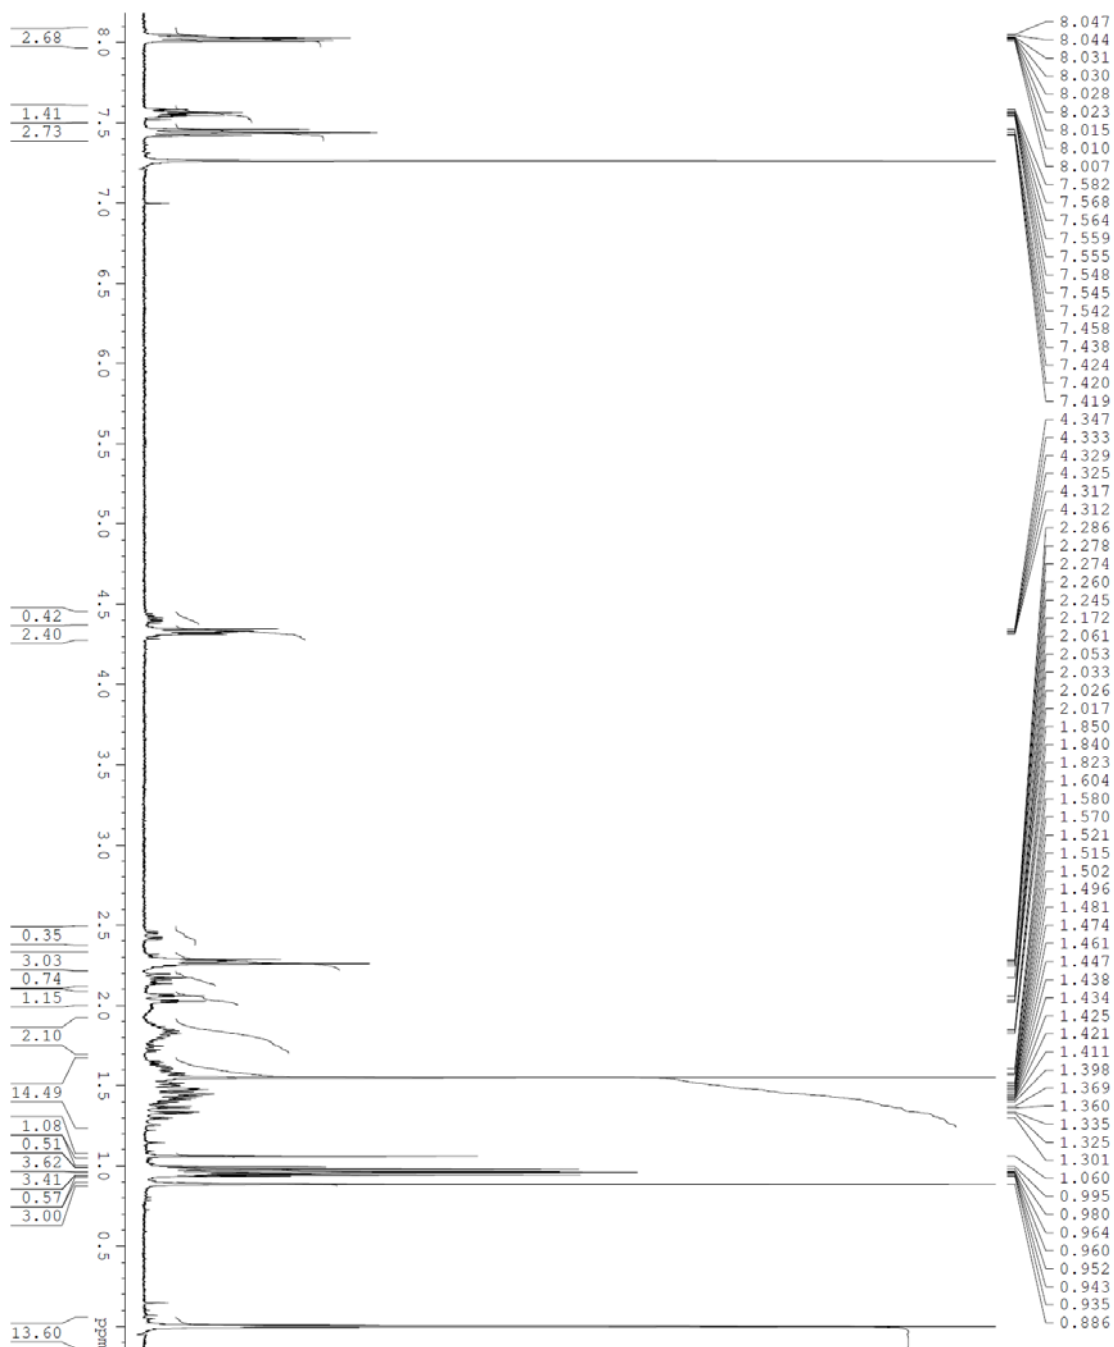

Customer Data Parameters  
NAME 071008 methyl ketone pure 1  
PROBHD 1  
P2 - Acquisition Parameters  
Date\_ 20071208  
Time\_ 13.11  
INSTRUM spect  
PROBHD 5 mm PABBO-BB-  
TOUPOK 65526  
SOLVENT CDCl3  
NUC1 13C  
P1 - Processing parameters  
SI 400.132470 MHz  
F2 400.130000 MHz  
ACQ 40.000 MHz  
DE 5.000 MHz  
TE 300.2 K  
D1 1.6000000 sec  
T2 1  
P2 - Acquisition Parameters  
NAME 071008 methyl ketone pure 1  
PROBHD 1  
P2 - Processing parameters  
SI 400.132470 MHz  
F2 400.130000 MHz  
ACQ 40.000 MHz  
DE 5.000 MHz  
TE 300.2 K  
D1 1.6000000 sec  
T2 1

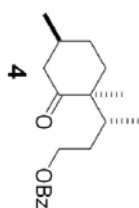

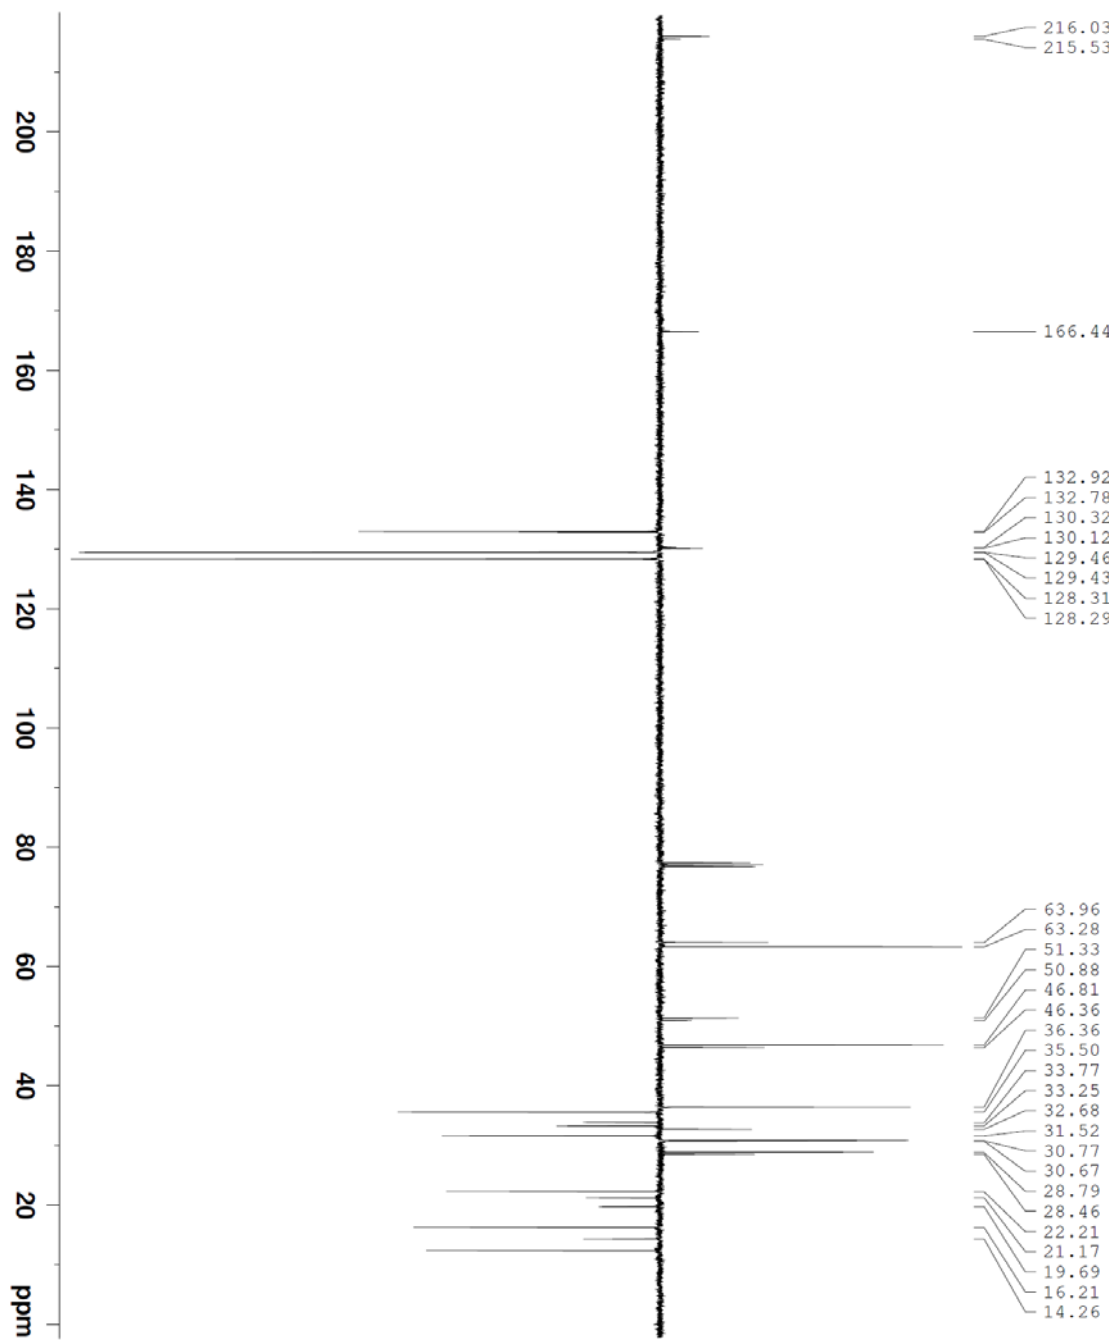

| Current Data Parameters     |                     |
|-----------------------------|---------------------|
| NAME                        | Value               |
| PROBNO                      | 071212 methylketone |
| PROBNO                      | 1                   |
| F2 - Acquisition Parameters |                     |
| Time                        | 20.10.45            |
| INSTRUM                     | 5 mm PABBO-HS       |
| PROBHD                      | 5 mm PABBO-HS       |
| NUC1                        | 13C                 |
| ID                          | C5356               |
| SOLVENT                     | CDCl3               |
| NS                          | 246                 |
| SH                          | 24039.441 Hz        |
| FIDRES                      | 0.466798 Hz         |
| AQ                          | 1.3531988 sec       |
| RG                          | 655.2               |
| DM                          | 20.800 usec         |
| DE                          | 2.600 usec          |
| TE                          | 296.0 K             |
| CHRG1                       | 1.0000000           |
| CHRG2                       | 1.0000000           |
| D12                         | 2.00000000 sec      |
| d120                        | 0.00689655 sec      |
| TD                          | 0.0000114 sec       |
| TD0                         | 1                   |
| CHANNEL F1                  |                     |
| PCP01                       | 13C                 |
| P2                          | 1.00 usec           |
| P1                          | 18.00 usec          |
| PL1                         | -2.00 dB            |
| SFO1                        | 100.6282878 MHz     |
| CHANNEL F2                  |                     |
| PCP02                       | 1H                  |
| P2                          | 10.00 usec          |
| P1                          | 1.00 usec           |
| PL2                         | -1.00 dB            |
| SFO2                        | 400.1185005 MHz     |
| F2 - Processing Parameters  |                     |
| SI                          | 32768               |
| SR                          | 100.6177433 MHz     |
| GB                          | 0                   |
| GBW                         | 0                   |
| LS                          | 1.00 Hz             |
| GB                          | 0                   |
| GC                          | 1.40                |

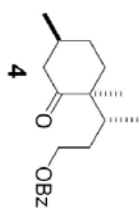



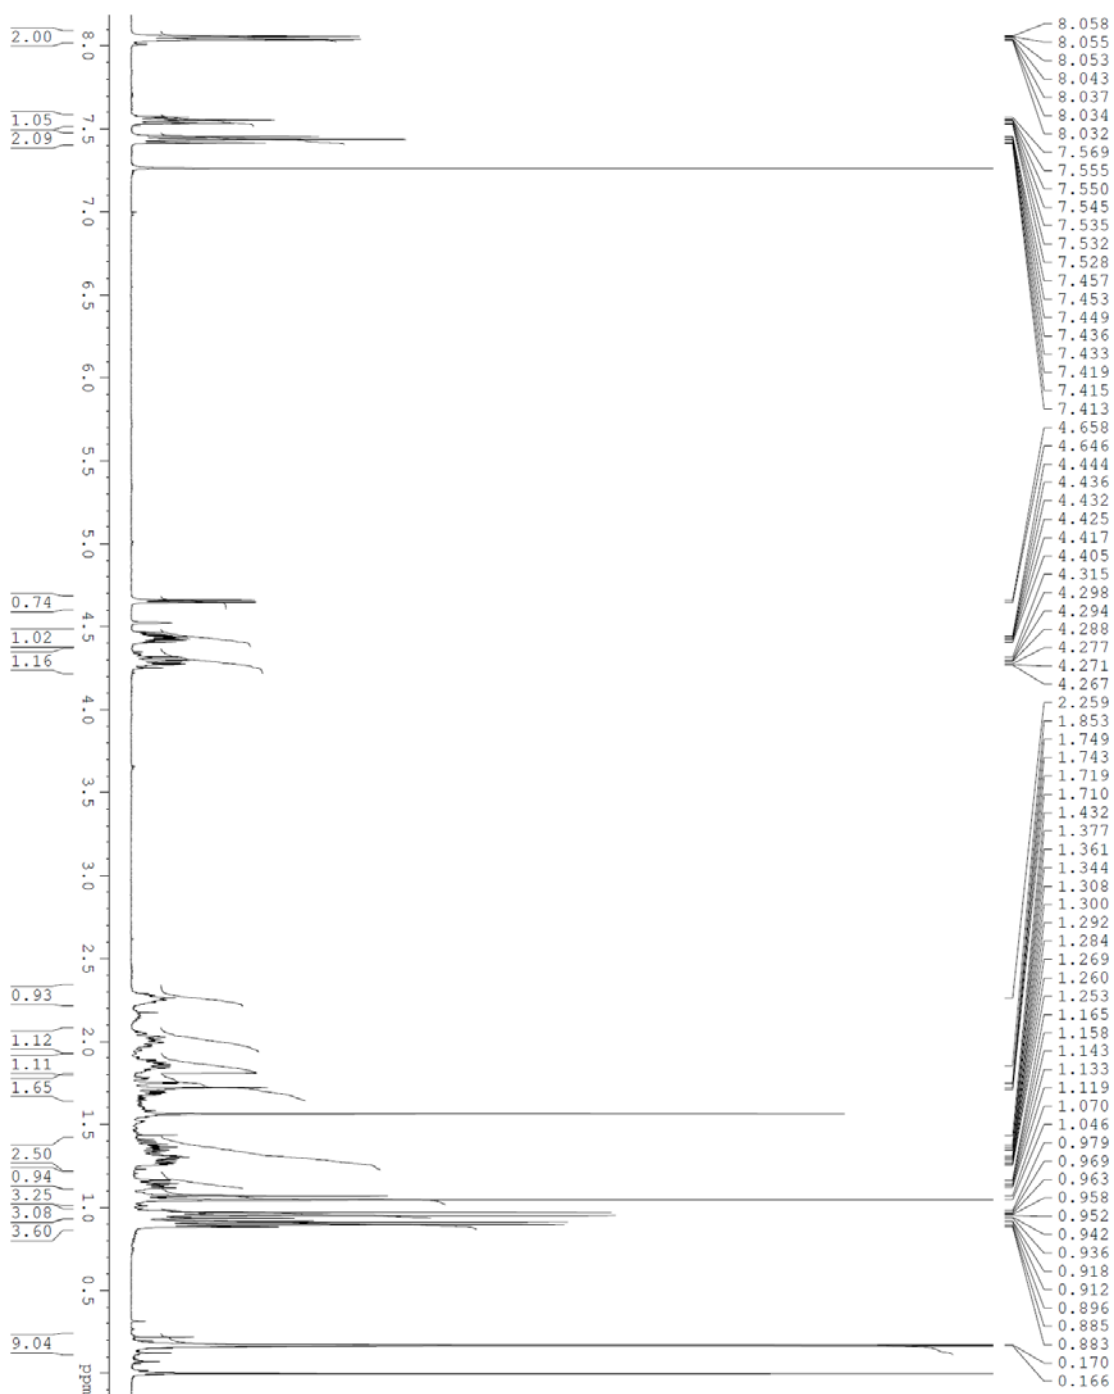

Current Data Parameters  
NAME 07112 allylphenol ether pure  
EXPNO 1  
PROCNO 1  
Date\_ Acquired 06/23/2008  
Time 12.19  
INSTRUM spect  
PROBHD 5 mm BBOBO-1H-  
PULPROG zgpg30  
SOLVENT CDCl3  
DS 4  
SOLVENT CDCl3  
SMA 8223.465 MHz  
AQ 0.0200000 sec  
RG 40.220 uMHC  
DE 6.99 uMHC  
TE 300.2 K  
DE 1.0000000 sec  
T50 1

===== CHANNEL f1 - 1H =====  
NUC1 1H 4.99 uMHC  
P1 14.50 uMHC  
PL1 -1.40 dB  
SFO1 400.1326710 MHz  
F2 - Processing parameters  
SF 400.1300055 MHz  
WDW EM  
SSB 0  
LB 0.35 Hz  
GB 0  
PC 1.00

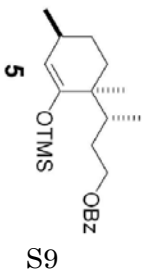

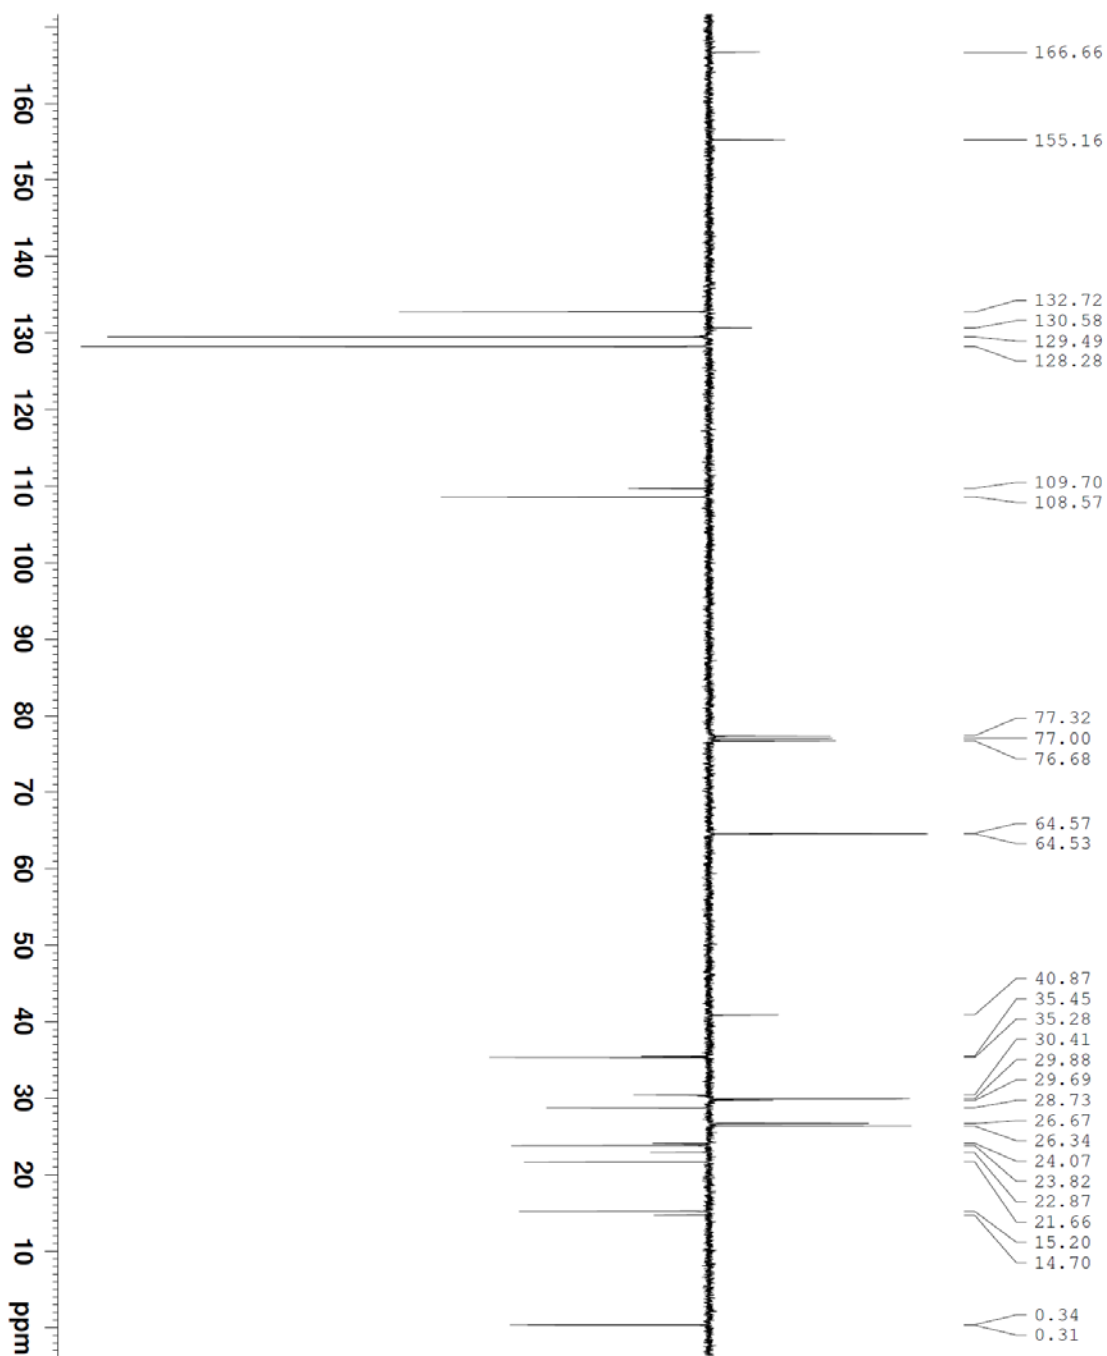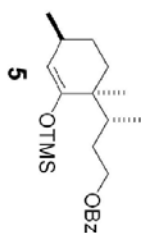

Current Data Parameters  
NAME 460121 sty/ether  
EXPNO 3  
PROCNO 1  
F2 - Acquisition Parameters  
Date\_ 20080121  
Time 18.45  
INSTRUM spect  
PROBHD 5 mm BBO BB-  
PULPROG zgpg30  
TD 65536  
SOLVENT CDCl3  
NS 256  
DS 4  
SWH 24018.46 Hz  
FIDRES 0.166798 Hz  
AQ 1.363198 sec  
RG 2.000000  
DE 2.000000  
TE 295.2 K  
T2 1.002950 sec  
T2RHO 0.280  
CSTRT2 145.000000 sec  
D1 2.00000000 sec  
DELTA 0.008845 sec  
DECTA 0.008845 sec  
TDS 1  
===== CHANNEL f1 =====  
NUC1 13C  
P1 9.00 usec  
PL 0.00 dB  
SFO1 100.622828 MHz  
===== CHANNEL f2 =====  
CPDPRG2 waltz16  
NUC2 1H  
P2 12.00 usec  
PL2 0.00 dB  
PL12 -1.40 dB  
SFO2 400.136005 MHz  
F2 - Processing parameters  
SI 32768  
SF 100.612771 MHz  
WDW EM  
SSB 0  
LB 1.00 Hz  
GB 0  
PC 1.40

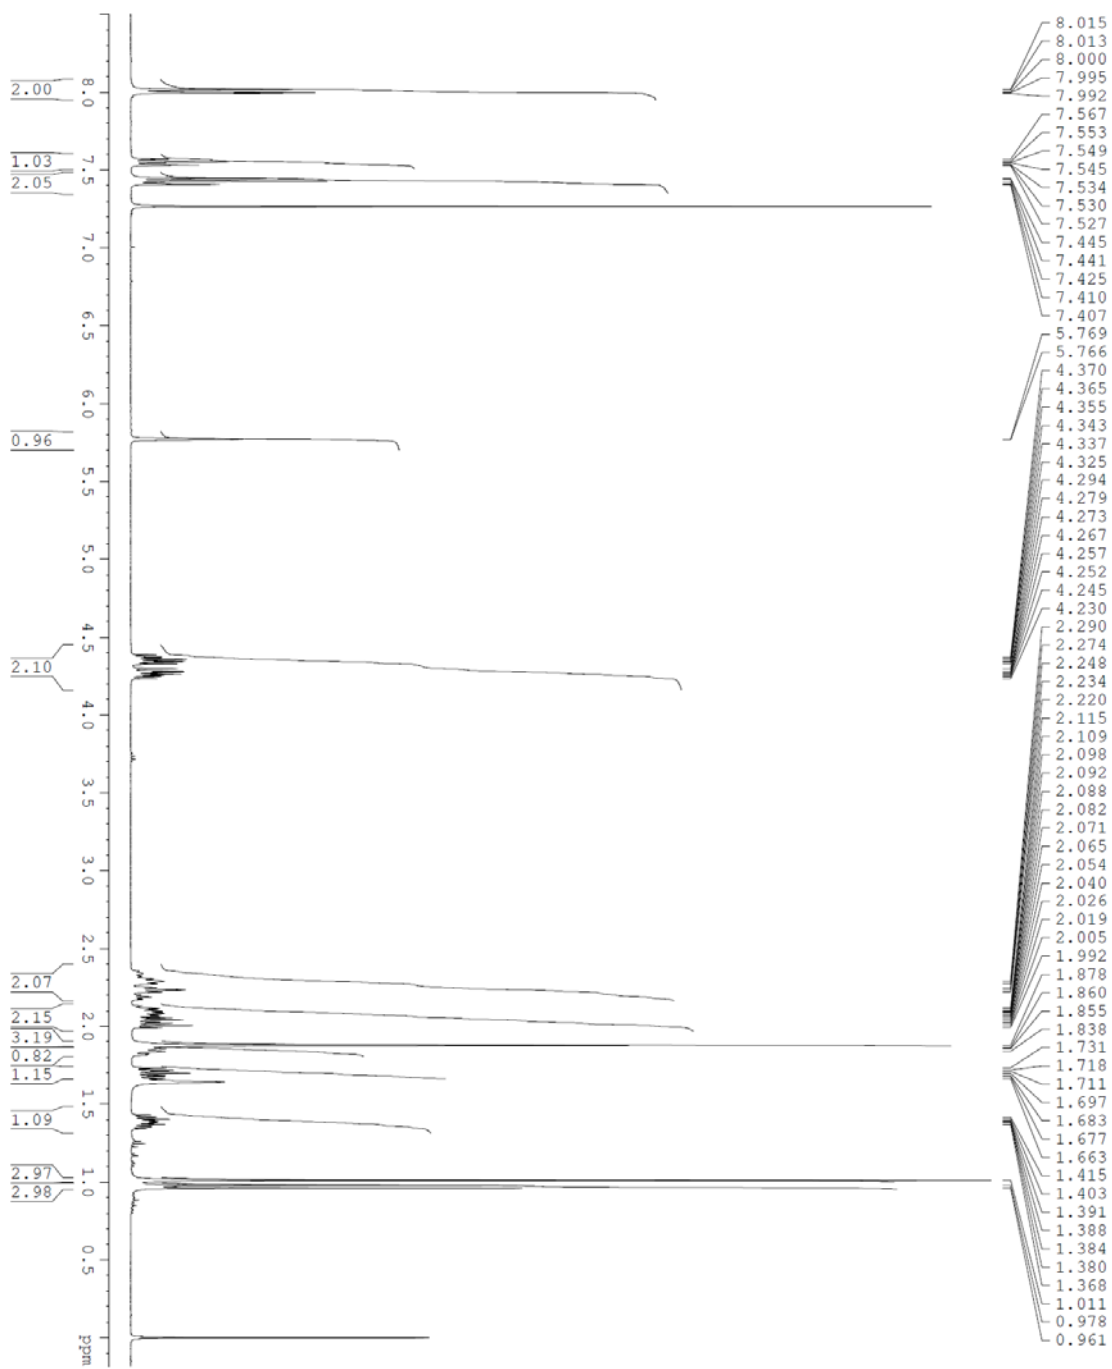

Current Data Parameters  
 NAME 050925 enone 00 pure  
 EXNO 1  
 PROCNO 1  
 F2 - Acquisition Parameters  
 Date\_ 20090925  
 Time\_ 17:52:33  
 INSTRUM spect  
 PROBHD 5 mm PABBO BB-  
 PULPROG zg30  
 TD 65536  
 SOLVENT CDCl3  
 NS 2  
 DS 2  
 SWH 8223.685 Hz  
 FIDRES 0.125483 Hz  
 AQ 3.9846387 sec  
 RG 181  
 ACQ 60.400 usec  
 DE 6.00 usec  
 TE 295.4 K  
 D1 1.00000000 sec  
 TDO 1  
 ===== CHANNEL f1 =====  
 NUC1 1H  
 P1 14.00 usec  
 PL1 -1.40 dB  
 SFO1 400.1324710 MHz  
 F2 - Processing parameters  
 SI 32768  
 SF 400.130029 MHz  
 WCN EX  
 SSB 0  
 LB 0.30 Hz  
 GB 0  
 PC 1.00

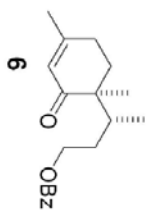



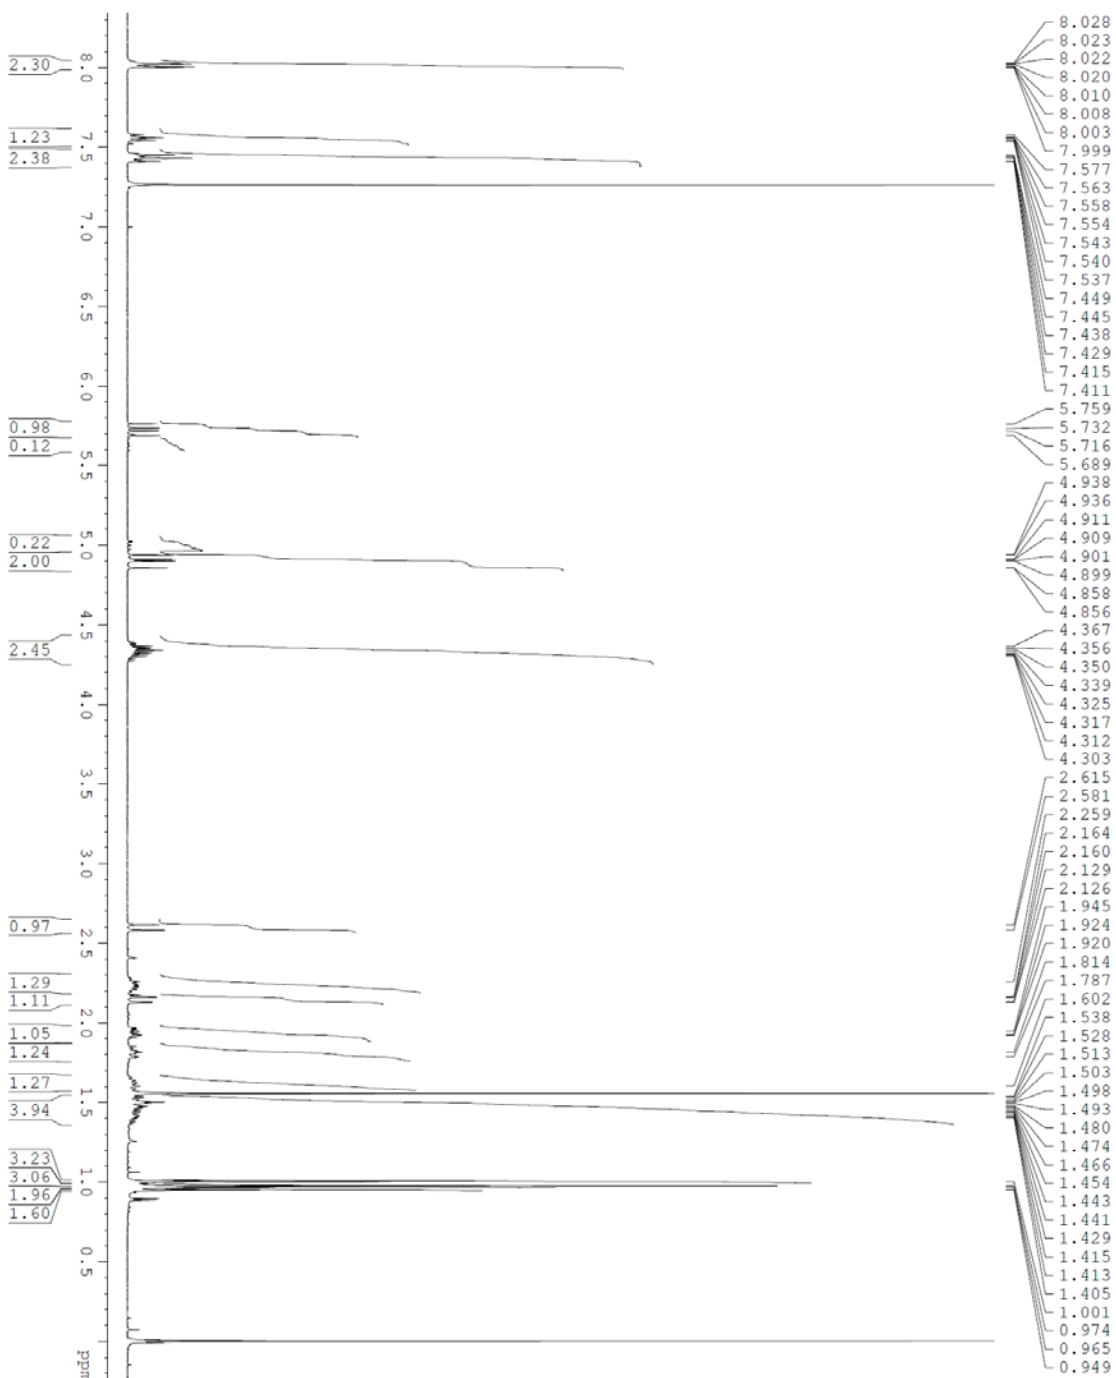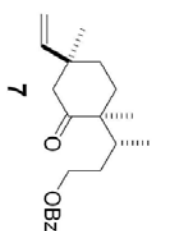

Current Data Parameters  
NAME 071226 v1a01 ketone  
EXPNO 1  
PROCNO 1  
F2 - Acquisition Parameters  
Date\_ 20071226  
Time 14:22  
INSTRUM spect  
PROBHD 5 mm PABBO BB-7  
PULPROG zgpg30  
TD 65536  
AQ 3.9846387 sec  
RG 322  
OR 60.400 usec  
DE 4.400 usec  
TE 295.1 K  
D1 1.00000000 sec  
TD0 1  
===== CHANNEL f1 =====  
NUC1 1H  
P1 14.00 usec  
PL 1.40 dB  
SFO1 400.126410 MHz  
F2 - Processing parameters  
SI 32768  
SF 400.130045 MHz  
WDW EM  
SSB 0  
LB 0.30 Hz  
GB 0  
PC 1.00

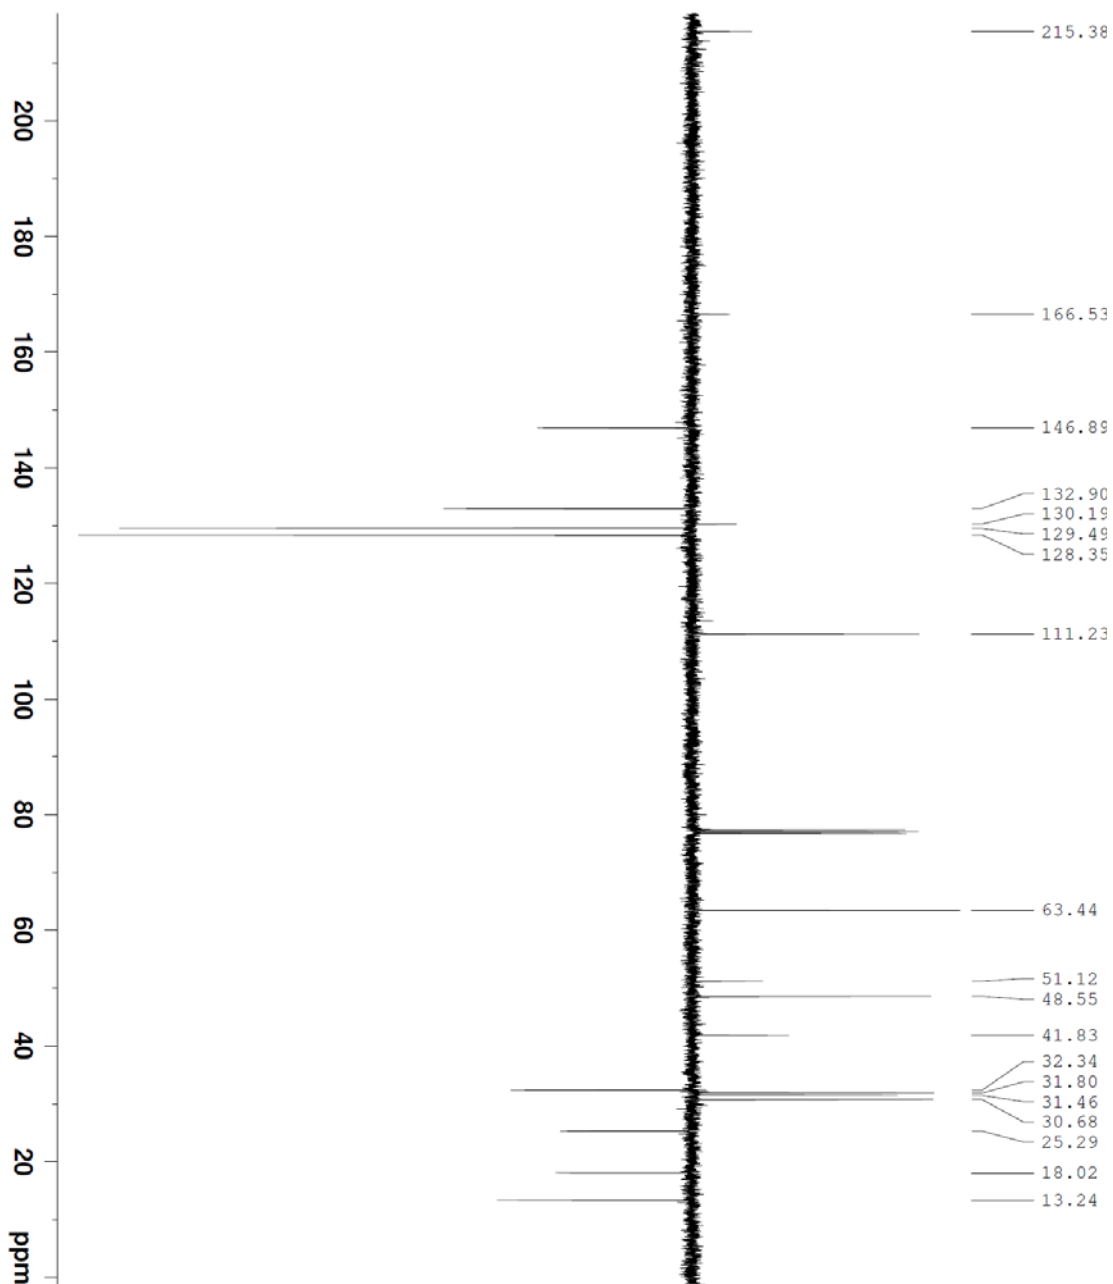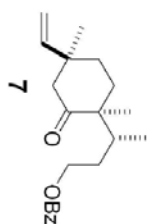

Current Data Parameters  
NAME 080122 ketone  
EXNO 1  
PROCNO 1

F2 - Acquisition Parameters  
Date\_ 20080122  
Time 20:37  
INSTRUM spect  
PROBHD 5 mm PABBO BB-  
PULPROG zgpg30  
TD 65536  
SOLVENT CDCl3  
NS 256  
DS 4  
SWH 24038.461 Hz  
FIDRES 0.366798 Hz  
AQ 1.361198 sec  
RG 656  
DQ 28.800 usec  
DE 6.00 usec  
TE 295.6 K  
CNS11 1.0000000  
CNS12 145.0000000 sec  
D1 2.0000000 sec  
DELTA 0.00001146 sec  
TDO 1

===== CHANNEL f1 =====  
NUC1 13C  
P1 9.10 usec  
P2 18.00 usec  
PL1 -2.00 dB  
SFO1 100.6228298 MHz

===== CHANNEL f2 =====  
NAME2 waltz16  
NUC2 1H  
PCPD2 100.00 usec  
PL12 15.68 dB  
PL2 -1.40 dB  
SFO2 400.1316005 MHz

F2 - Processing parameters  
SI 32768  
SF 100.612715 MHz  
WDW EM  
SSB 0  
LB 1.00 Hz  
GB 0  
PC 1.40

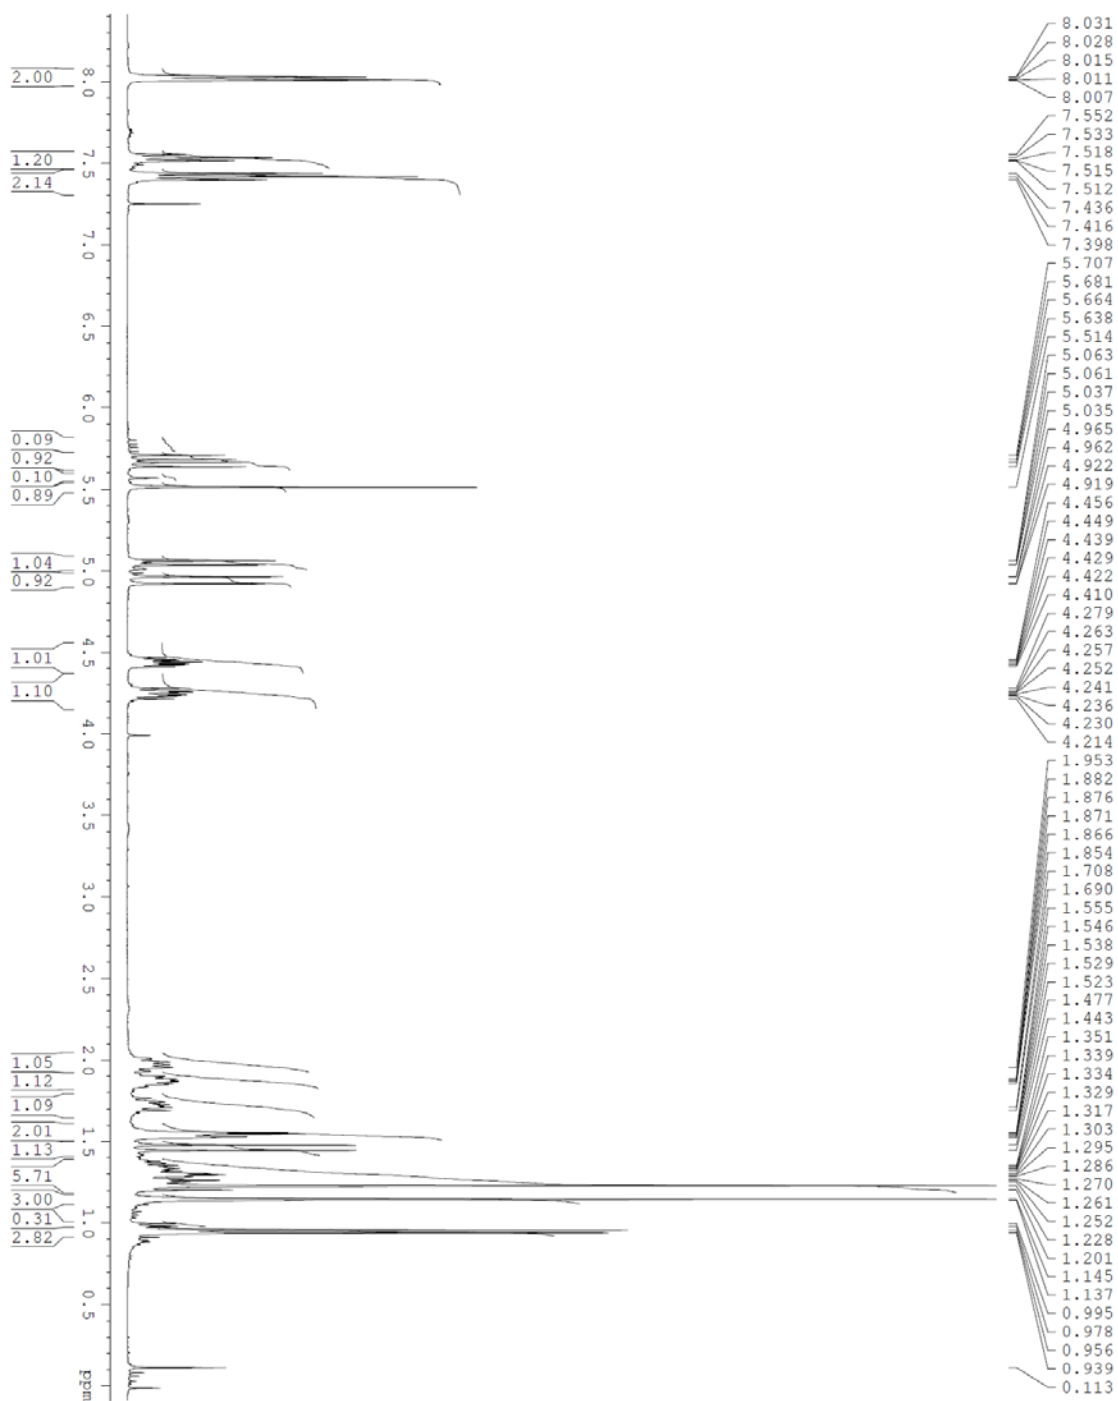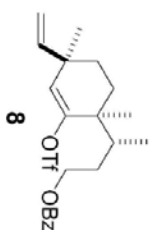

```

Current Data Parameters
NAME      080515 t1.f16
EXPNO     1
PROCNO    1

F2 - Acquisition Parameters
Date_     20080515
Time      16.20
INSTRUM   spect
PROBHD    5 mm PABBO BB-
PULPROG   zg30
TD         65536
SOLVENT   CDCl3
NS         16
DS         2
SWH        8223.685
FIDRES     0.123483
AQ         3.9846387
RG         18
DM         60.800
DE         6.00
TE         325.4
D1         1.00000000
TD0        1

===== CHANNEL f1 =====
NUC1       1H
P1         14.00
PL1        -1.40
SFO1       400.1324710

F2 - Processing parameters
SI         32768
SE         400.1300888
WDW        EM
SSB        0
LB         0.30
GB         0
PC         1.00

```

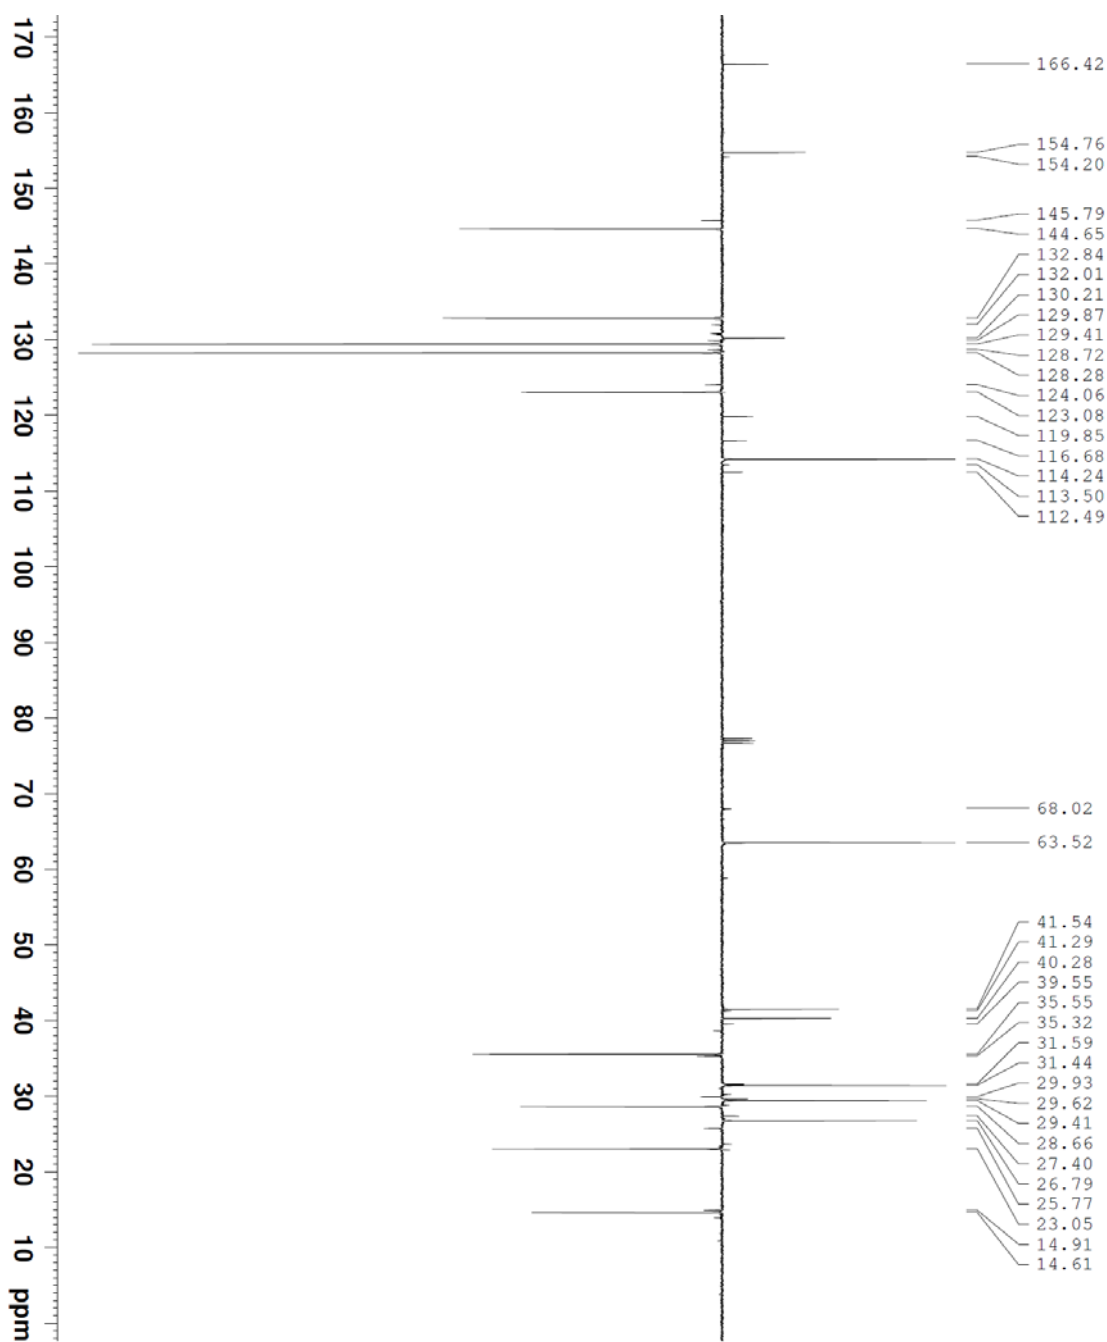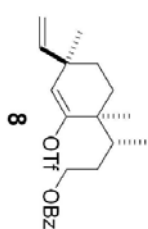

Current Data Parameters  
 Name: 080313 still1a c13  
 EXNO: 1  
 PROCNO: 1  
 P2 - Acquisition Parameters  
 Date\_: 20080415  
 Time: 16.37  
 INSTRUM: spect  
 PROBHD: 5 mm PABBO  
 PULPROG: zgpg30  
 TD: 65536  
 FIDRES: 0.153  
 SOLVENT: CDCl3  
 NS: 2048  
 DS: 4  
 SWH: 24038.461 Hz  
 F1RES: 0.366788 Hz  
 F2RES: 0.366788 Hz  
 RG: 1.000000  
 DW: 14.400 sec  
 DE: 20.800 usec  
 TE: 300.2 K  
 DELTA: 6.00 usec  
 CDEFT1: 1.000000 R  
 CNST1: 1.45,000000 sec  
 D1: 2.0000000 sec  
 D2: 0.0000000 sec  
 DELTA: 0.0001146 sec  
 TDS: 1  
 ===== CHANNEL f1 =====  
 NUC1: 13C  
 P1: 9.00 usec  
 PL1: 0.00 dB  
 SFO1: 100.628268 MHz  
 ===== CHANNEL f2 =====  
 NUC2: 13C  
 P2: 9.00 usec  
 PL2: 0.00 dB  
 SFO2: 100.628268 MHz  
 P2 - Processing parameters  
 SF: 100.612763 MHz  
 WDW: EM  
 SSB: 0 Hz  
 GB: 0 Hz  
 PC: 1.40



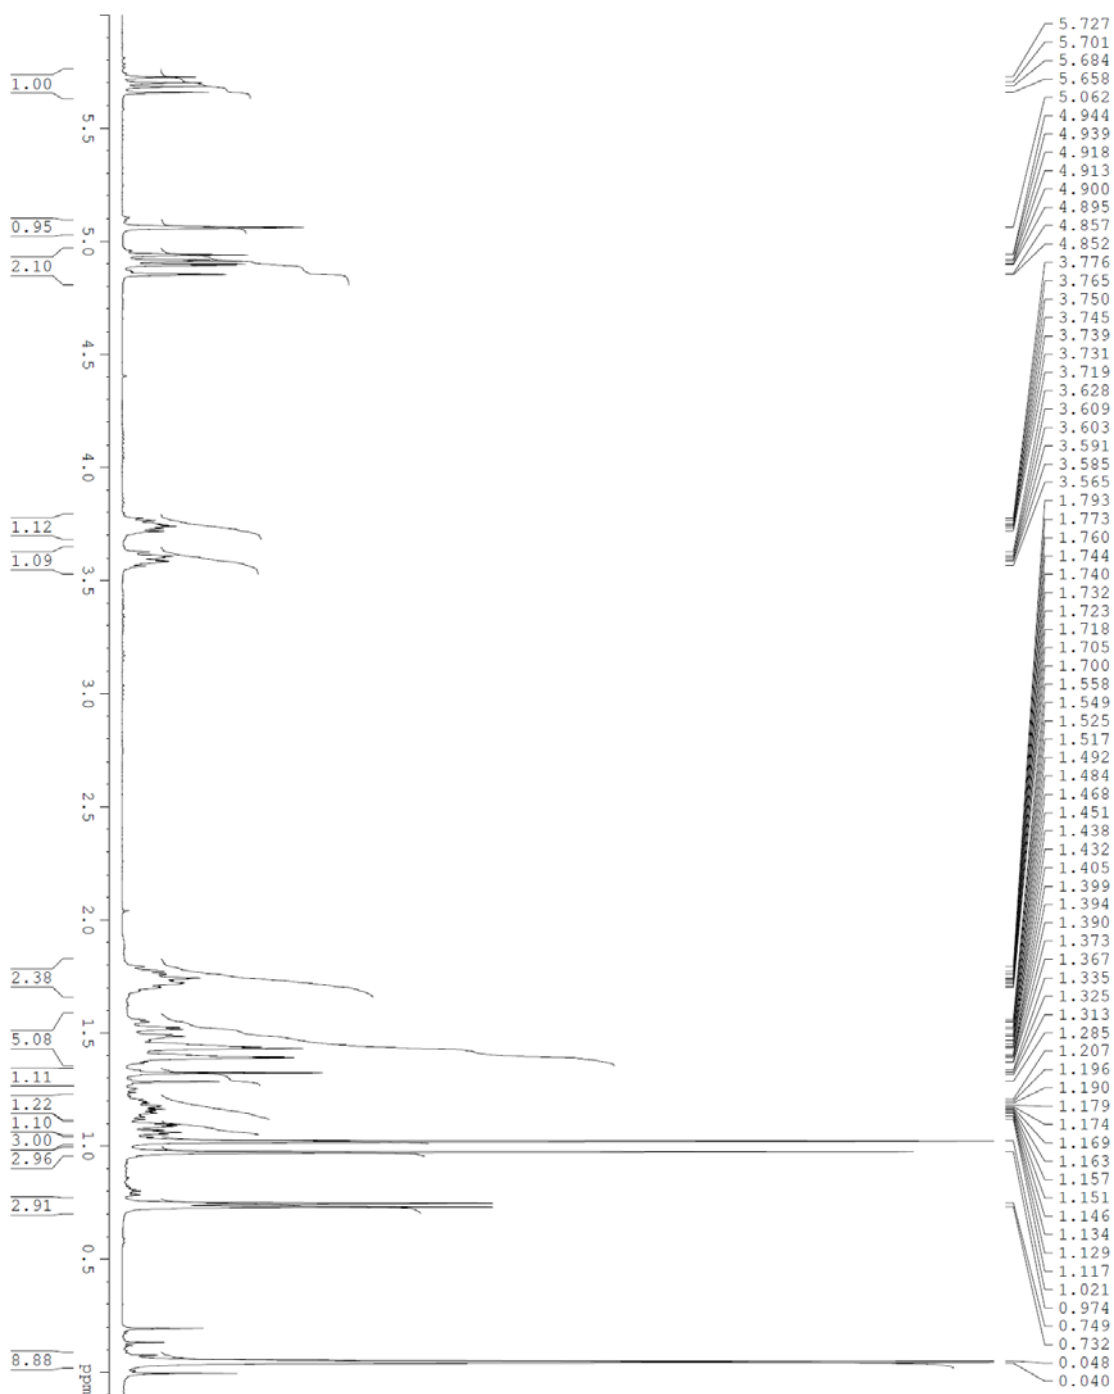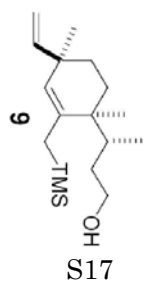

Current Data Parameters  
NAME 080604 allyltrim on  
EXPNO 1  
PROCNO 1  
F2 - Acquisition Parameters  
Date\_ 20080604  
Time 16:26  
INSTRUM spect  
PROBHD 5 mm PABBO BB-  
PULPROG zgpg30  
TD 65536  
SOLVENT CDCl3  
NS 16  
DS 4  
SWH 8223.685 Hz  
FIDRES 0.125483 Hz  
AQ 3.9845187 sec  
RG 60.800 usec  
CW 6.00 usec  
DE 200.00 KHz  
TE 300.2 K  
TDO 1.0000001 sec  
===== CHANNEL f1 =====  
NUC1 1H  
P1 14.00 usec  
PA 2.40 dB  
SFO1 400.126170 MHz  
F2 - Processing parameters  
SI 32768  
SF 400.1300051 MHz  
WDW EM  
SSB 0  
GB 0  
PC 1.00

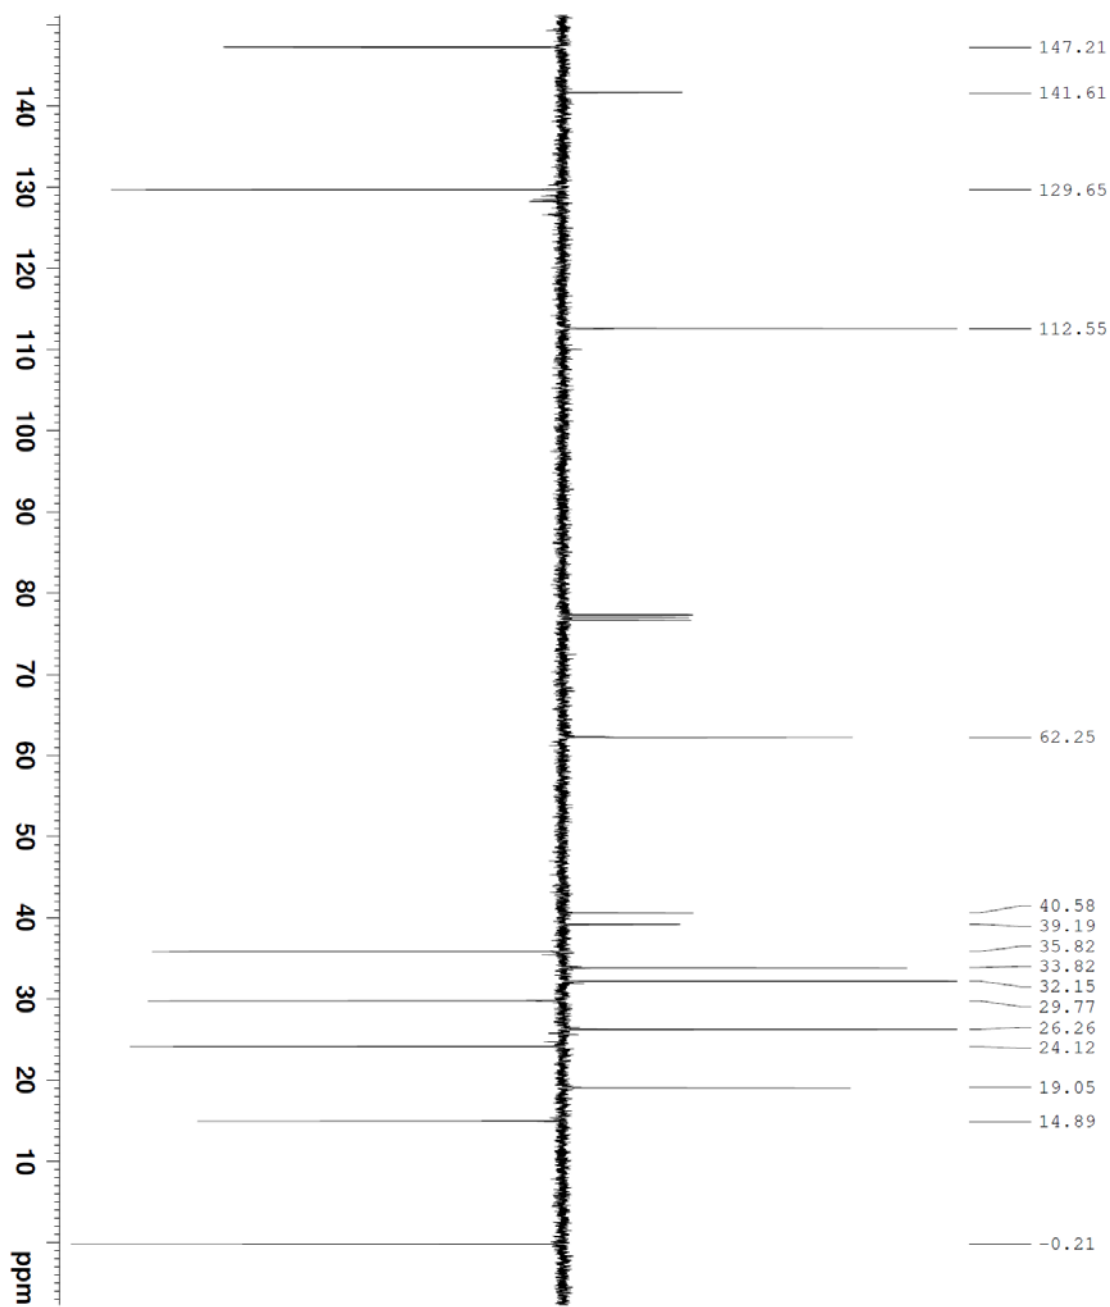[illegible]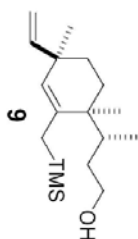

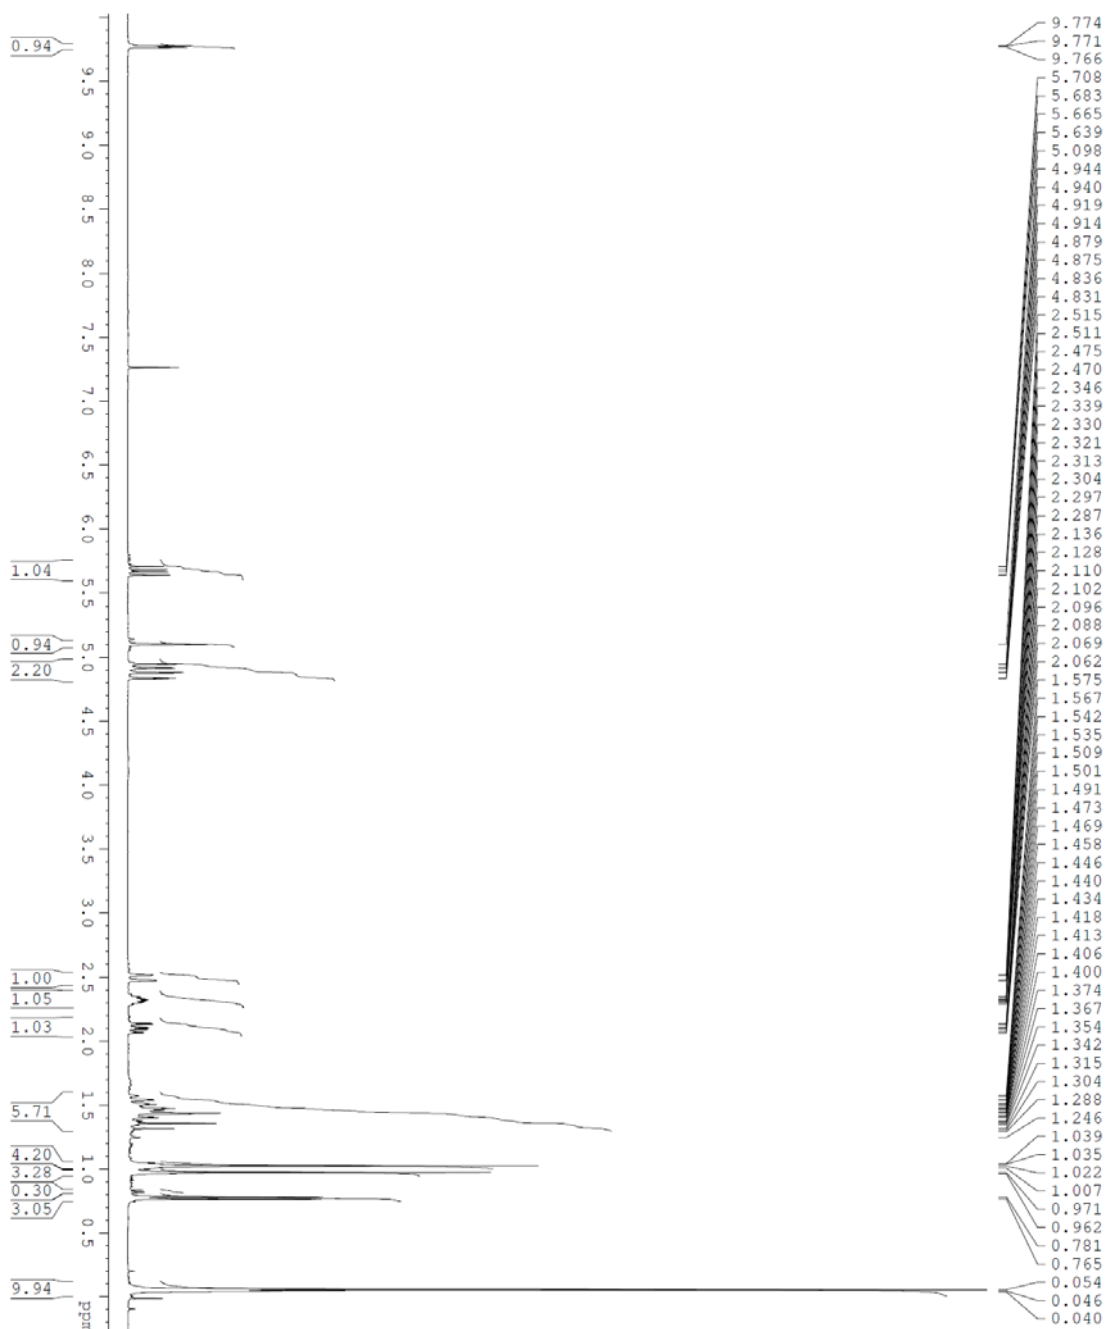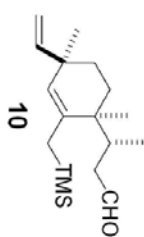

Current Data Parameters  
NAME 080519 aldehyde  
EXPNO 1  
PROCNO 1  
F2 - Acquisition Parameters  
Date\_ 20080519  
Time 17.53  
INSTRUM spect  
PROBHD 5 mm PABBO BB-  
PULPROG zgpg30  
TD 65536  
SOLVENT CDCl3  
NS 16  
DS 2  
SWH 8223.685 Hz  
FIDRES 0.125483 Hz  
AQ 3.9846387 sec  
RG 36  
DW 60.800 usec  
DE 6.00 usec  
TE 295.6 K  
D1 1.00000000 sec  
D10 1  
===== CHANNEL f1 =====  
NUC1 1H  
P1 14.00 usec  
PL1 -1.00 dB  
SFO1 400.1324710 MHz  
F2 - Processing parameters  
SI 32768  
SF 400.1300051 MHz  
WDW EN  
SSB 0  
LB 0.30 Hz  
GB 0  
PC 1.00

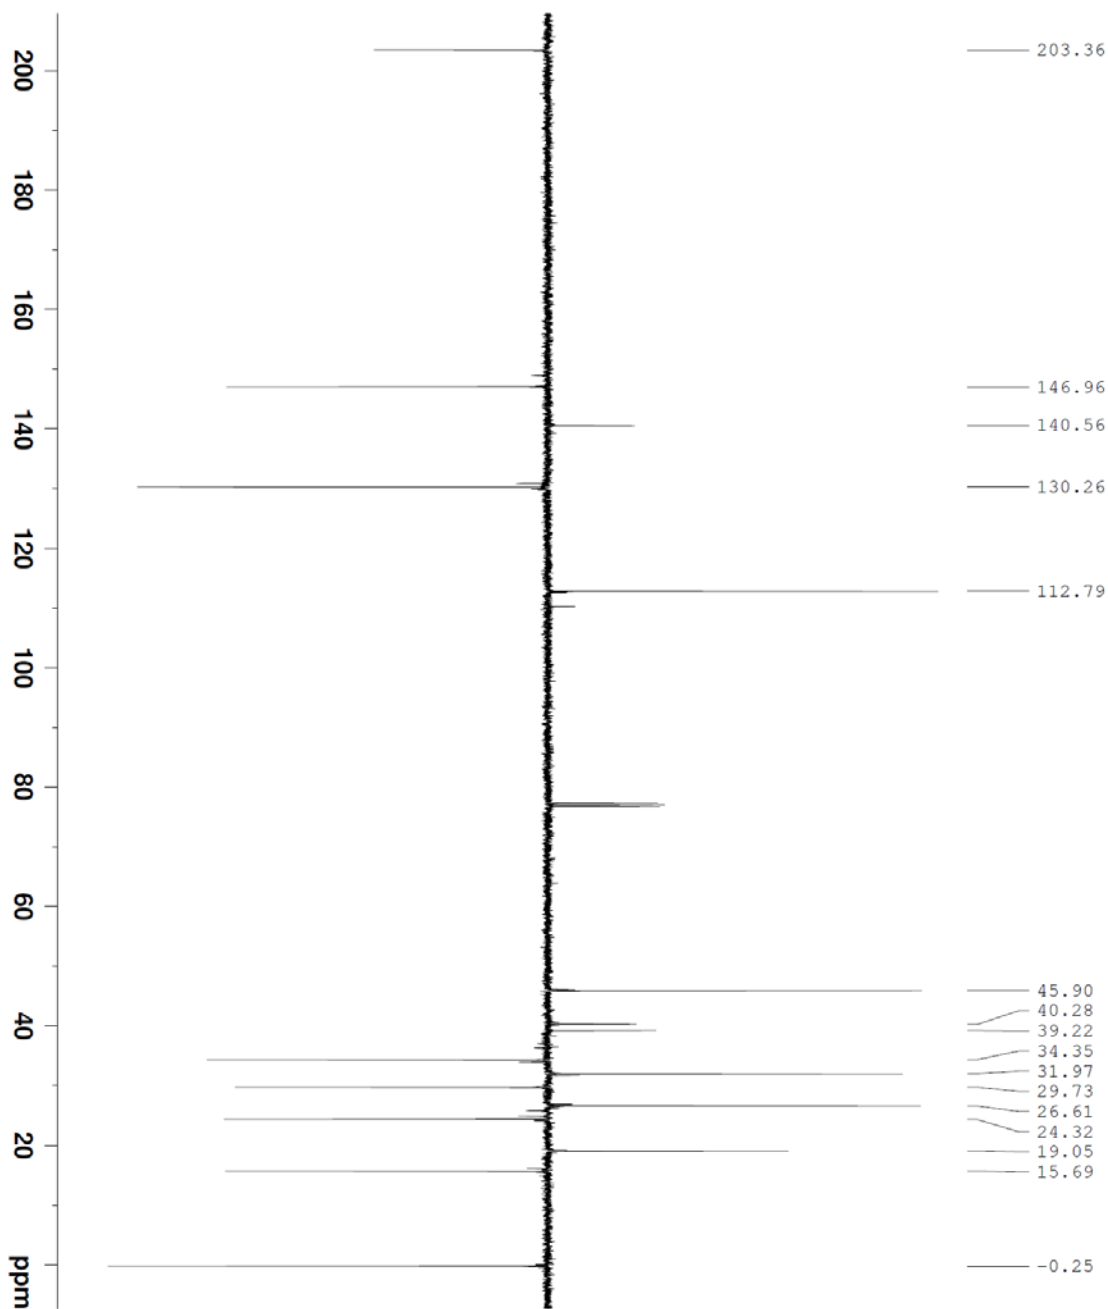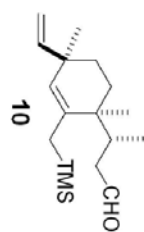

Current Data Parameters  
NAME 080519 aldehyde 13c  
EXPNO 1  
PROCNO 1  
F2 - Acquisition Parameters  
Date\_ 20081119  
Time 18.11  
INSTRUM spect  
PROBHD 5 mm PABO BB-  
TD 6554  
FIDRES 0.354  
TD 6554  
SOLVENT CDCl3  
NS 256  
DS 4  
SWH 24038.461 Hz  
FIDRES 0.36798 Hz  
AQ 1.361198 sec  
RG 327.5  
DE 20.400 usec  
TE 300.2 K  
CPDPRG2waltz16  
CHRG2 145.000000  
D1 2.00000000 sec  
D2 0.00689555 sec  
D3 0.00001149 sec  
TD 1  
===== CHANNEL f1 =====  
NUC1 13C  
P1 12.00 usec  
PL1 0.00 dB  
SFO1 100.628268 MHz  
===== CHANNEL f2 =====  
CPDPRG2waltz16  
NUC2 1H  
P2 100.00 usec  
PL2 15.68 dB  
SFO2 400.1316005 MHz  
F2 - Processing parameters  
SI 32768  
SF 100.612797 MHz  
WDW EM  
SSB 0  
LB 1.00 Hz  
GB 0  
PC 1.40

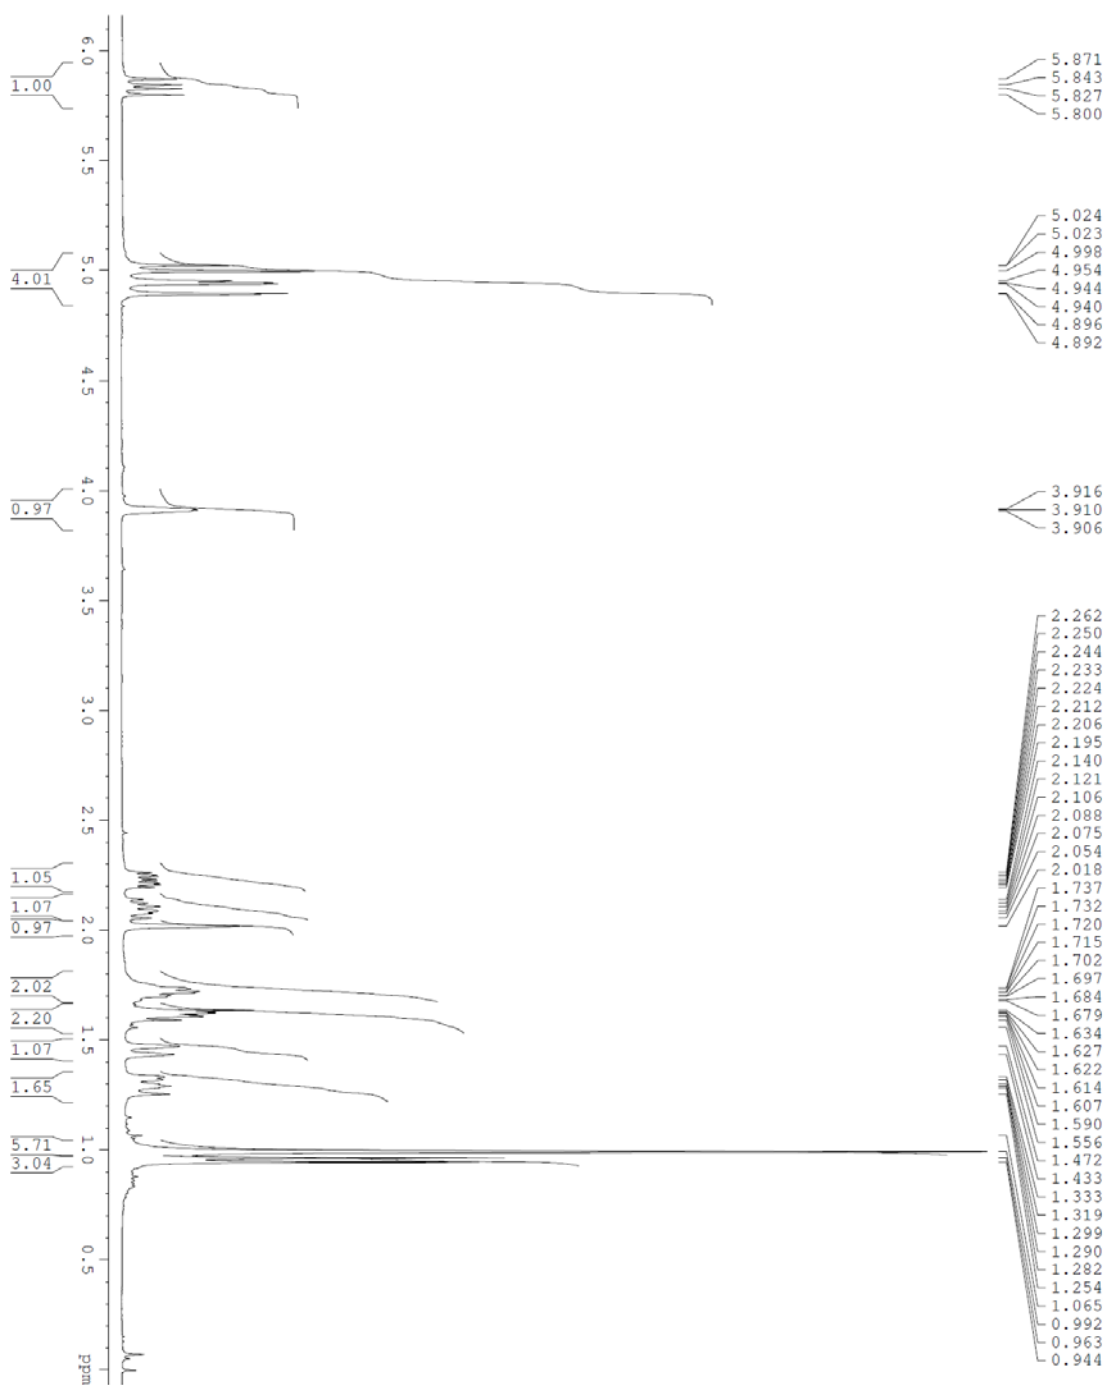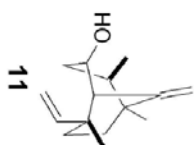

Current Data Parameters  
NAME 080616 EXAC1011 1H  
EXPNO 1  
PROCNO 1

F2 - Acquisition Parameters  
Date\_ 20080616  
Time 10.37  
INSTRUM spect  
PROBHD 5 mm PABBO  
PULPROG zg30  
TD 65536  
SOLVENT CDCl3  
NS 16  
DS 2  
SWH 8223.685 Hz  
FIDRES 0.023464 Hz  
AQRES 3.984637 sec  
RG 18  
DM 60.800 usec  
DE 6.00 usec  
TE 295.6 K  
D1 1.00000000 sec  
TD0 1

===== CHANNEL f1 =====  
NUC1 1H  
P1 14.00 usec  
PL1 -1.40 dB  
SFO1 400.1324710 MHz

F2 - Processing parameters  
SI 32768  
SF 400.129952 MHz  
WDW EM  
SSB 0  
LB 0.30 Hz  
GB 0  
PC 1.00



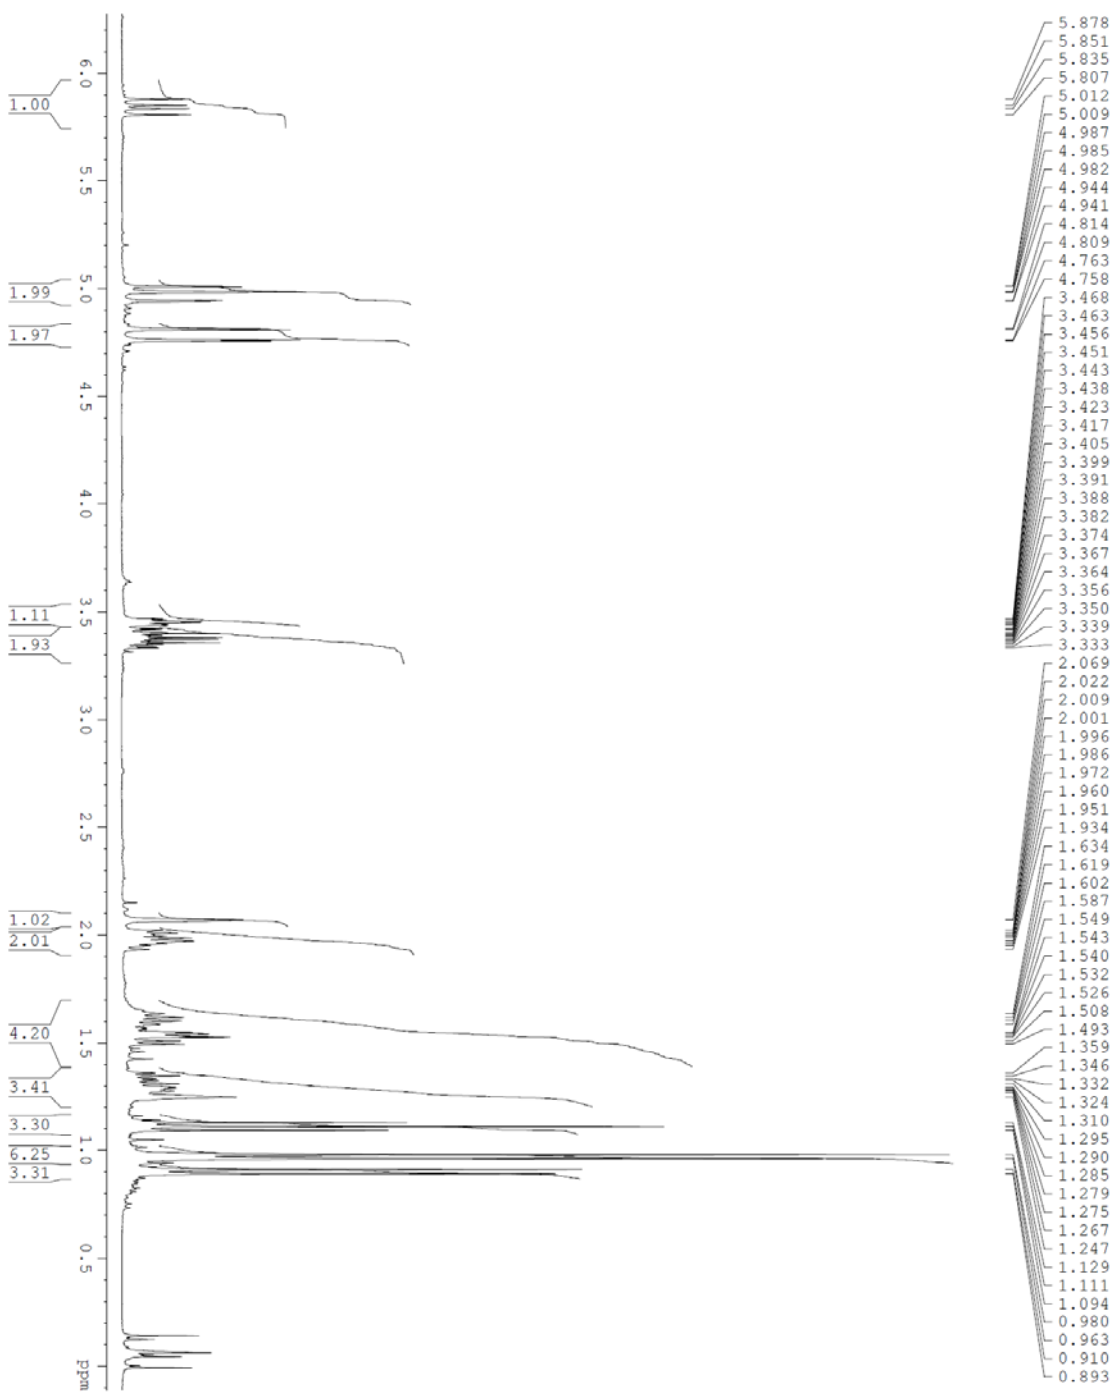

Current Data Parameters  
NAME 080516 ethyl eth  
EXPNO 1  
PROCNO 1  
F2 - Acquisition Parameters  
Date\_ 20080616  
Time 11:13  
INSTRUM spect  
PROBHD 5 mm PABO BB-  
PULPROG zg30  
TD 65536  
SOLVENT CDCl3  
NS 16  
DS 2  
SWH 8223.685 H  
FIDRES 0.324483 H  
AQ 3.984387 s  
RG 80.6  
DW 60.800 u  
DE 6.00 u  
TE 295.5 K  
D1 1.0000000 s  
ID0 1  
===== CHANNEL f1 =====  
NUC1 1H  
P1 14.00 u  
PL1 -1.40 d  
SFO1 400.1324710 N  
F2 - Processing parameters  
SI 32768  
SF 400.130070 N  
WDW EM  
SSB 0  
GB 0  
PC 1.00

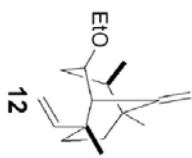

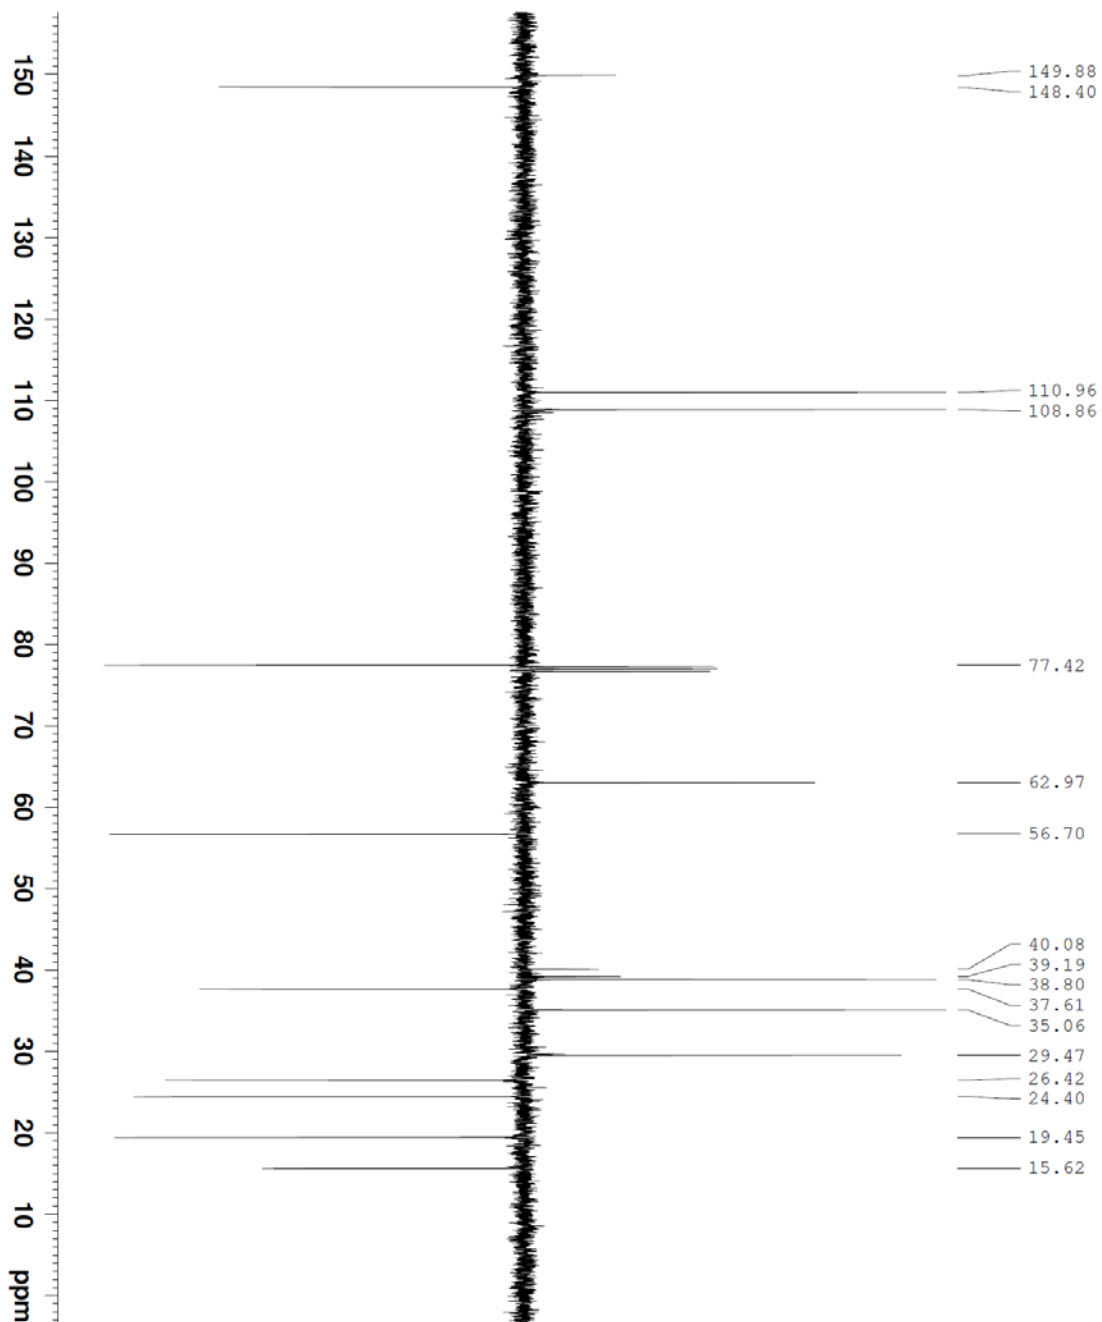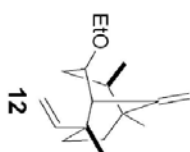

Current Data Parameters  
NAME: 06016 exp1 ether 13c2  
EXPNO: 1  
PROCNO: 1  
F2 - Acquisition Parameters  
Date\_: 20100116  
Time: 11.53  
INSTRUM: spect  
PROBHD: 5 mm PABBO BB-  
PULPROG: zgpg30  
TD: 65536  
SOLVENT: CDCl3  
DS: 11  
DE: 4  
SHE: 24018.461 Hz  
NUC1: 13C  
NUC2: 1H  
RG: 16400  
AQ: 1.531968 sec  
RG: 16400  
DM: 20.000 umsec  
DE: 4.000 umsec  
TE: 298.3 K  
CHRG1: 1.0000000  
CHRG2: 1.484300000  
D1: 2.00000000 sec  
D2: 0.0089655 sec  
DELTA: 0.00002145 sec  
TD0: 1  
===== CHANNEL f1 =====  
NUC1: 13C  
P1: 9.00 umsec  
PL1: -1.50 dB  
PL12: -1.50 dB  
SFO1: 100.628269 MHz  
===== CHANNEL f2 =====  
CPDPRG2: waltz16  
NUC1: 13C  
NUC2: 1H  
P1: 100.00 umsec  
PL1: 15.00 dB  
PL12: -1.40 dB  
SFO2: 400.116005 MHz  
F2 - Processing parameters  
SI: 32768  
SF: 100.627767 MHz  
WDW: EM  
SSB: 0 Hz  
NGB: 1  
GB: 0  
PC: 1.40



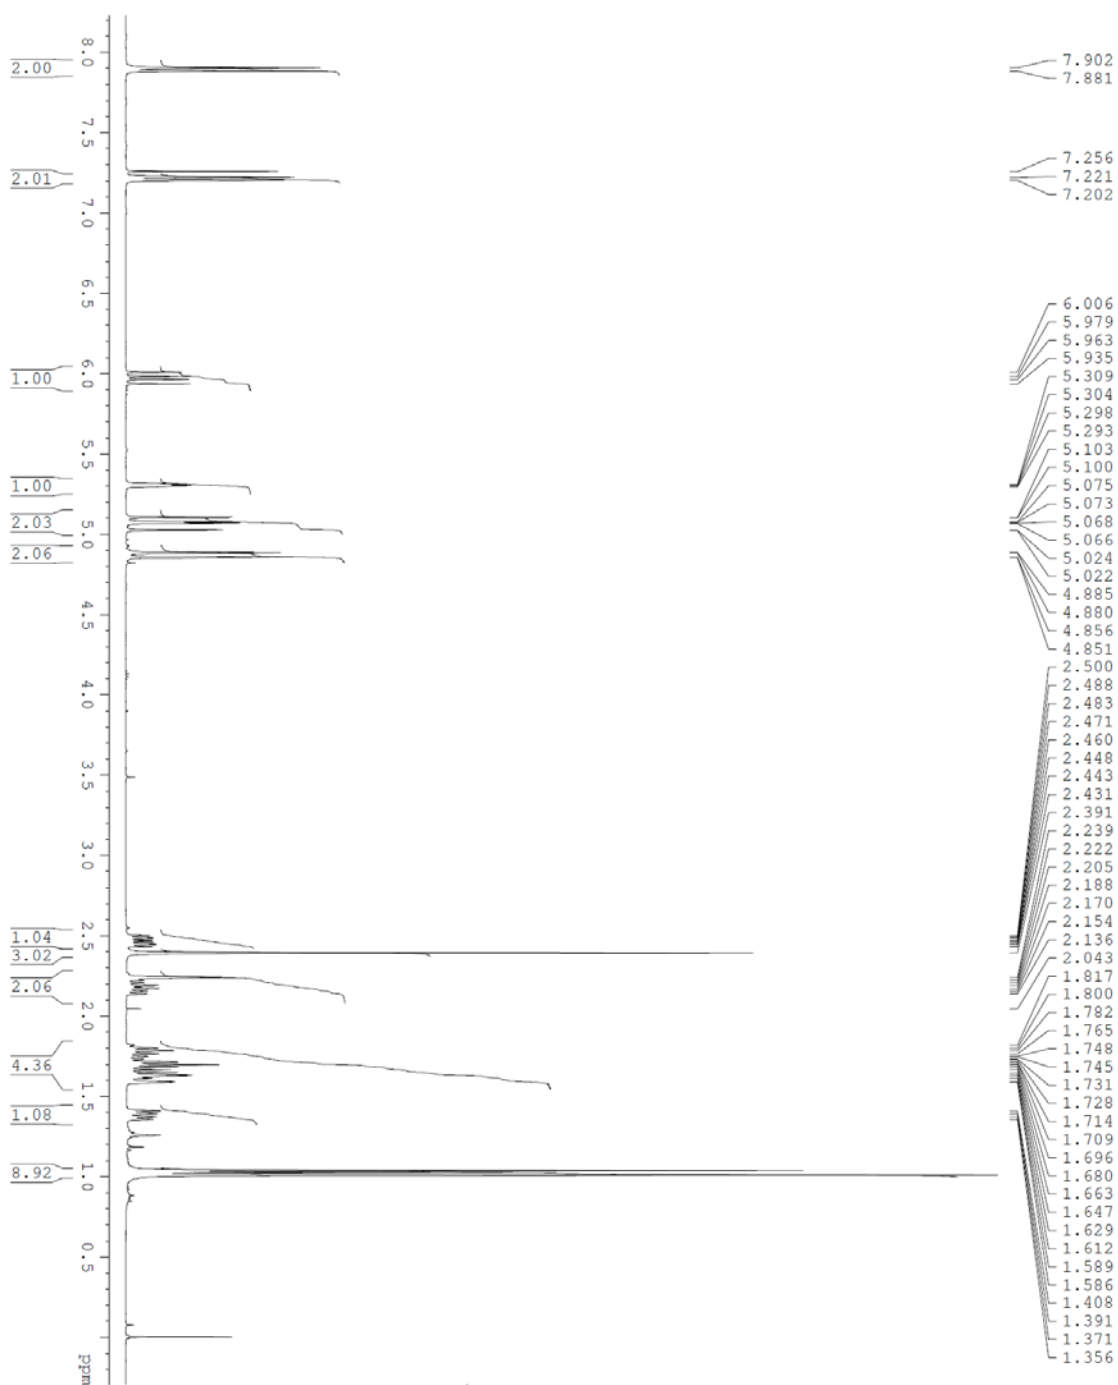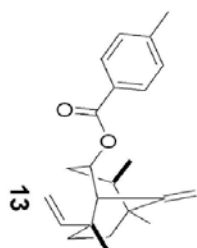

Current Data Parameters  
NAME 081213 p-toluat  
EXPNO 1  
PROCNO 1

F2 - Acquisition Parameters  
Date\_ 20081213  
Time 15.27  
INSTRUM spect  
PROBHD 5 mm PABBO BBO  
PULPROG zgpg30  
TD 65536  
SOLVENT CDCl3  
NS 16  
DS 2  
SWH 8223.685  
FIDRES 0.125483  
AQ 3.9846387  
RG 71.8  
DW 60.800  
DE 6.00  
TE 294.9  
D1 1.00000000  
ID0 1

===== CHANNEL f1 =====  
NUC1 1H  
P1 12.30  
PL1 -1.00  
SFO1 400.1324710

F2 - Processing parameters  
SI 32768  
SF 400.130065  
WDW EM  
SSB 0  
LB 0.30  
GB 0  
PC 1.00

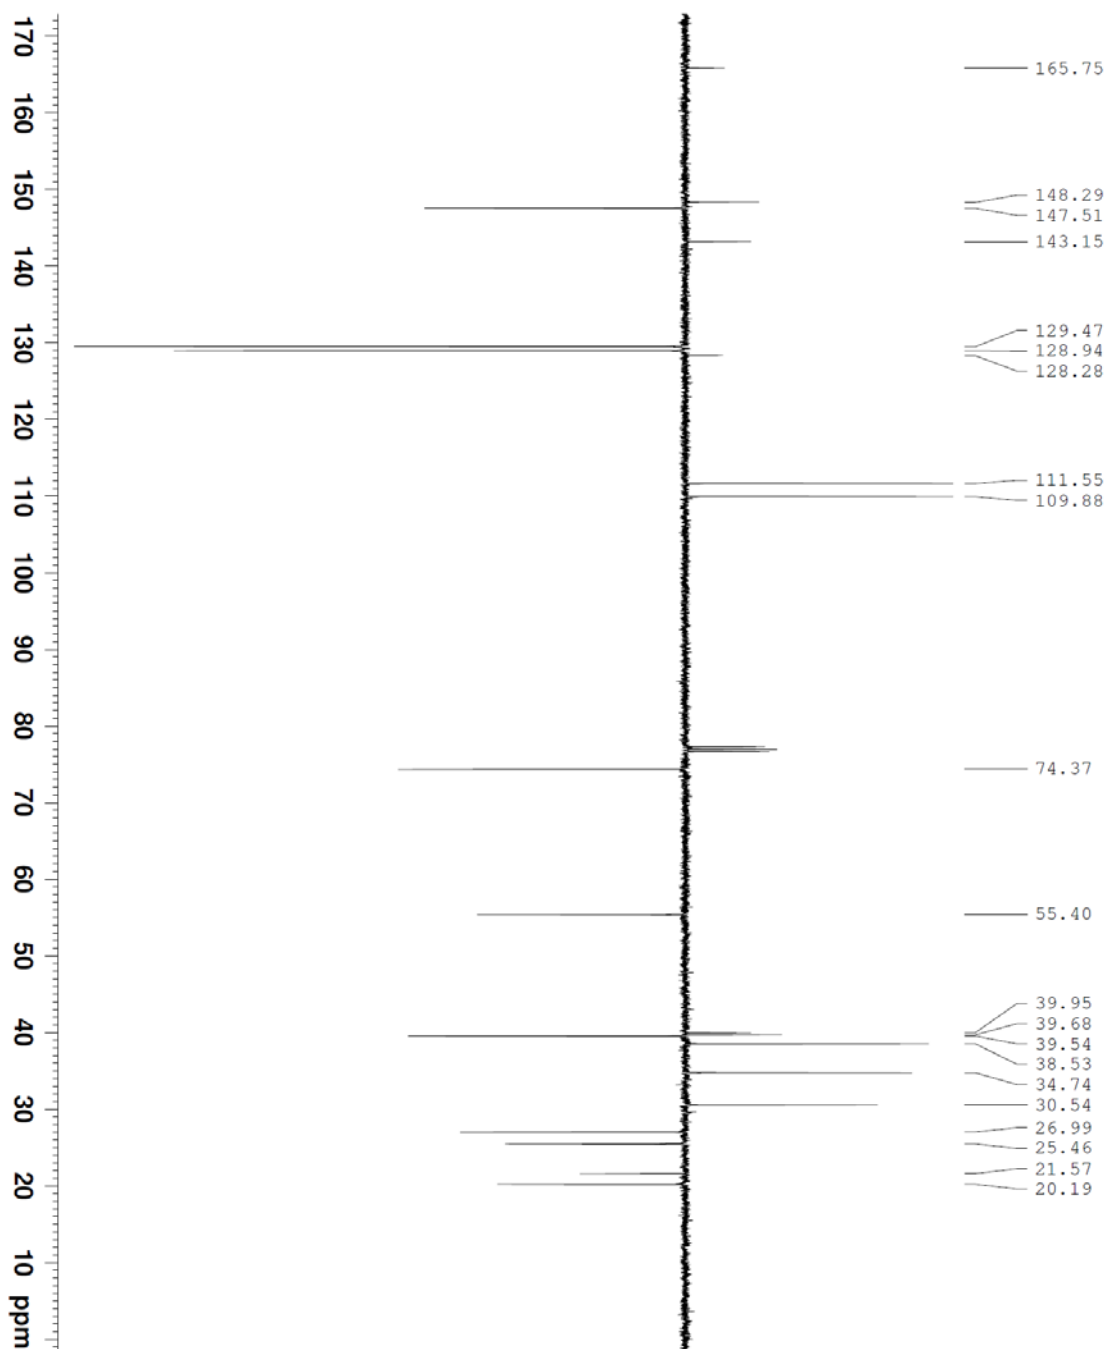

Current Data Parameters  
NAME 081113 p-rotate 13c  
EXPNO 1  
PROCNO 1  
F2 - Acquisition Parameters  
Date\_ 20081213  
Time 15.45  
INSTRUM spect  
PROBHD 5 mm PABBO BB-  
PULPROG zgpg30  
TO 65516  
TD 65536  
SFO 400.141  
RG 320  
DS 4  
SWH 24038.461 Hz  
FIDRES 0.330649 Hz  
AQ 1.361198 sec  
RG 16400  
DM 20.800 umsec  
DE 6.00 umsec  
TE 296.5 K  
CQ111 1.000000  
CQ112 1.000000  
D1 2.0000000 sec  
d20 0.0068965 sec  
DELTA 0.0001019 sec  
ID0 1

===== CHANNEL f1 =====  
NUC1 13C  
P1 8.00 umsec  
P2 16.00 umsec  
PL1 -2.00 dB  
PL2  
SFO1 100.628298 MHz

===== CHANNEL f2 =====  
CDEPRG2 waltz16  
NUC2 1H  
PCPD2 80.00 umsec  
PL12 -1.00 dB  
PL12 15.26 dB  
SFO2 400.1316005 MHz

F2 - Processing parameters  
SI 32768  
SF 400.1316005 MHz  
KCY 100.6127524  
SSB 0  
LB 1.00 Hz  
GB  
PC 1.40

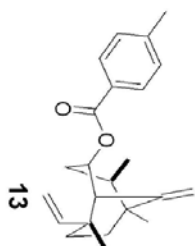

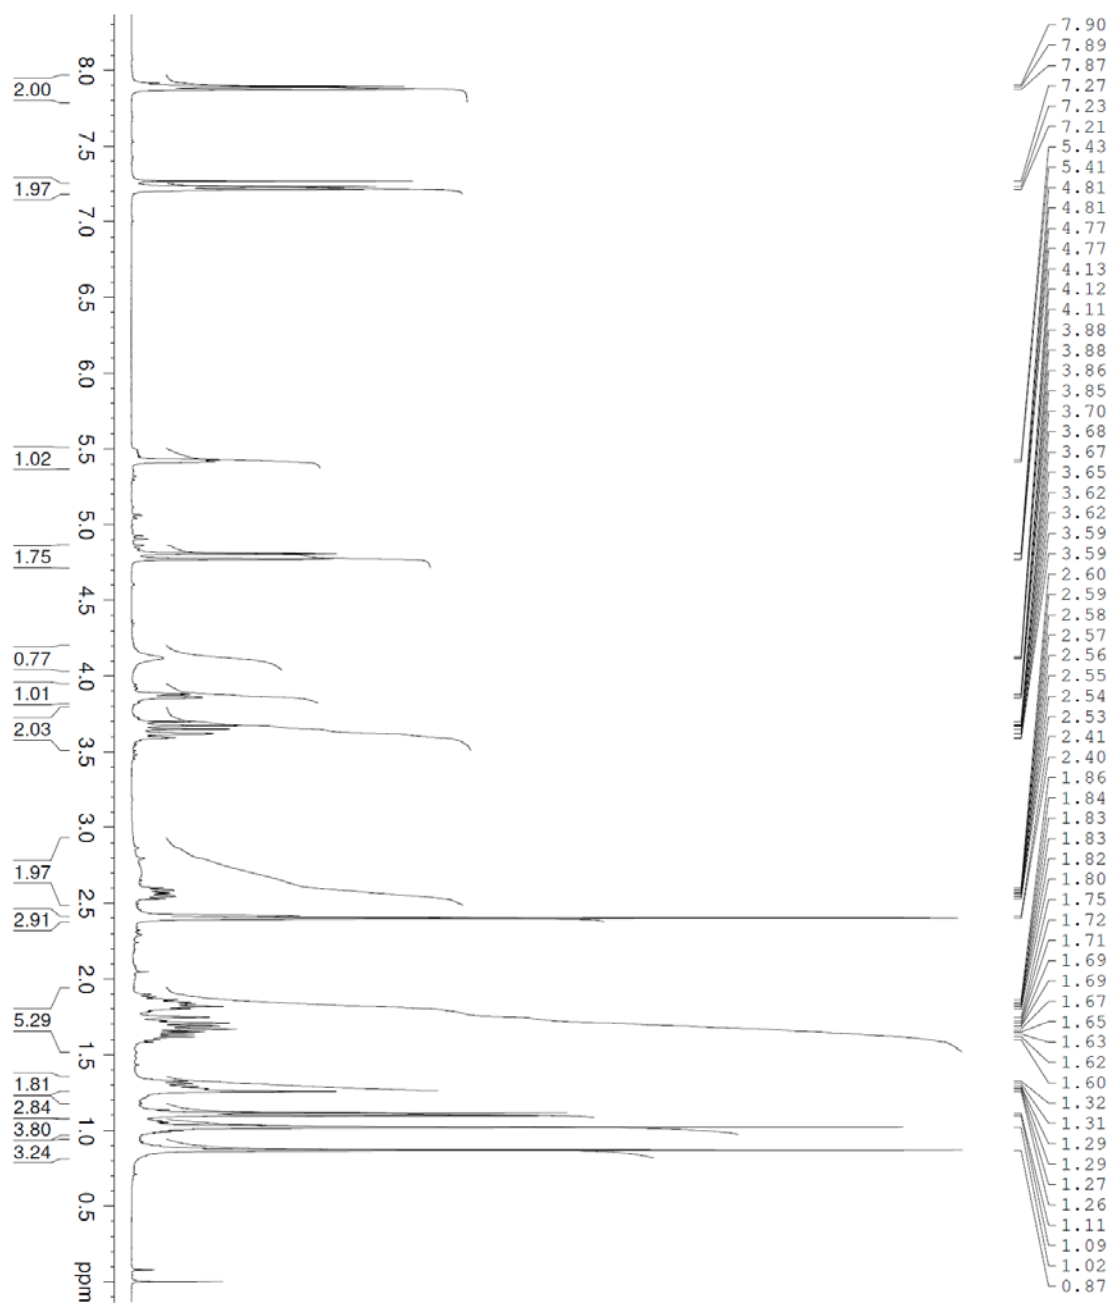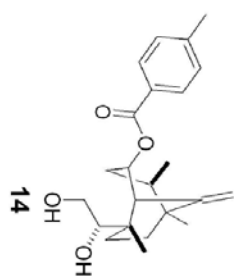

Current Data Parameters  
NAME 091029 dlo 1  
EXPNO 1  
PROCNO 1

F2 - Acquisition Parameters  
Date\_ 20090129  
Time 13:20  
INSTRUM spect  
PROBHD 5 mm PABO BB-  
PULPROG zg30  
TD 65536  
SOLVENT CDCl3  
NS 16  
DS 2  
FIDRES 8223.685 Hz  
AQ 0.12583 Hz  
RG 3.9846387 sec  
RG 59.8  
DW 60.800 usec  
DE 6.50 usec  
TE 300.2 K  
D1 1.0000000 sec  
TDO 1

CHANNEL f1  
NUC1 1H  
P1 12.20 usec  
PL1 0.00 dB  
PL1W 10.05604267 W  
SFO1 400.1324710 MHz

F2 - Processing parameters  
SI 32768  
SF 400.1300929 MHz  
WDW HANN  
SSB 0  
LB 0.30 Hz  
GB 0  
PC 1.00

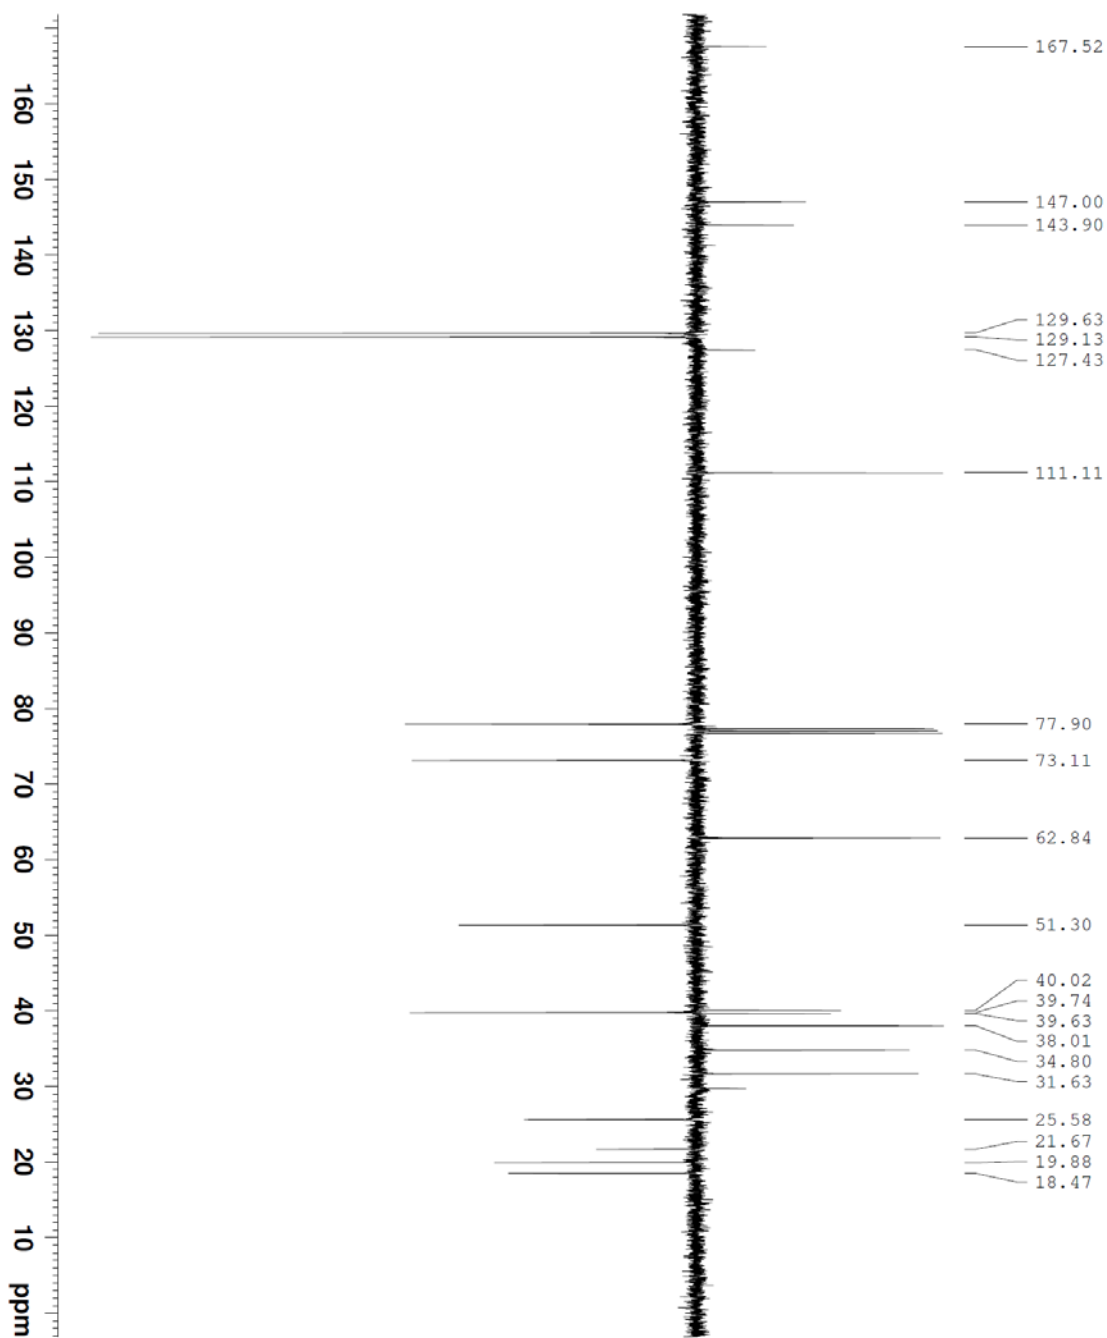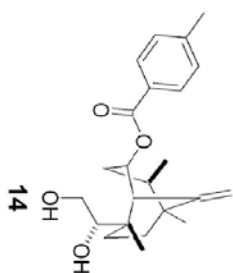

Current Data Parameters  
 NAME: 091219\_0101\_8\_13c  
 EXPRNO: 1  
 PROCNO: 1  
 F2 - Acquisition Parameters  
 Date\_Time: 20081227 19:20  
 INSTRUM: spect  
 PROBHD: 5 mm PABBO BB-  
 PULPROG: zgpg30  
 TD: 65536  
 SOLVENT: CDCl3  
 NS: 256  
 DS: 4  
 SWH: 24038.461 Hz  
 FIDRES: 0.366798 Hz  
 AQ: 1.3631988 sec  
 RG: 16400  
 DW: 20.800 usec  
 DE: 1.0000000  
 TE: 295.6 K  
 CNUC1: 13C  
 CNUC2: 13C  
 D1: 2.0000000 sec  
 D2: 0.0000000 sec  
 DELTA: 0.00001019 sec  
 TDO: 1  
 F2 - Processing parameters  
 SI: 32768  
 SF: 100.6127714 MHz  
 WTMW: EM  
 SSB: 0  
 GB: 1.00 Hz  
 PC: 1.40

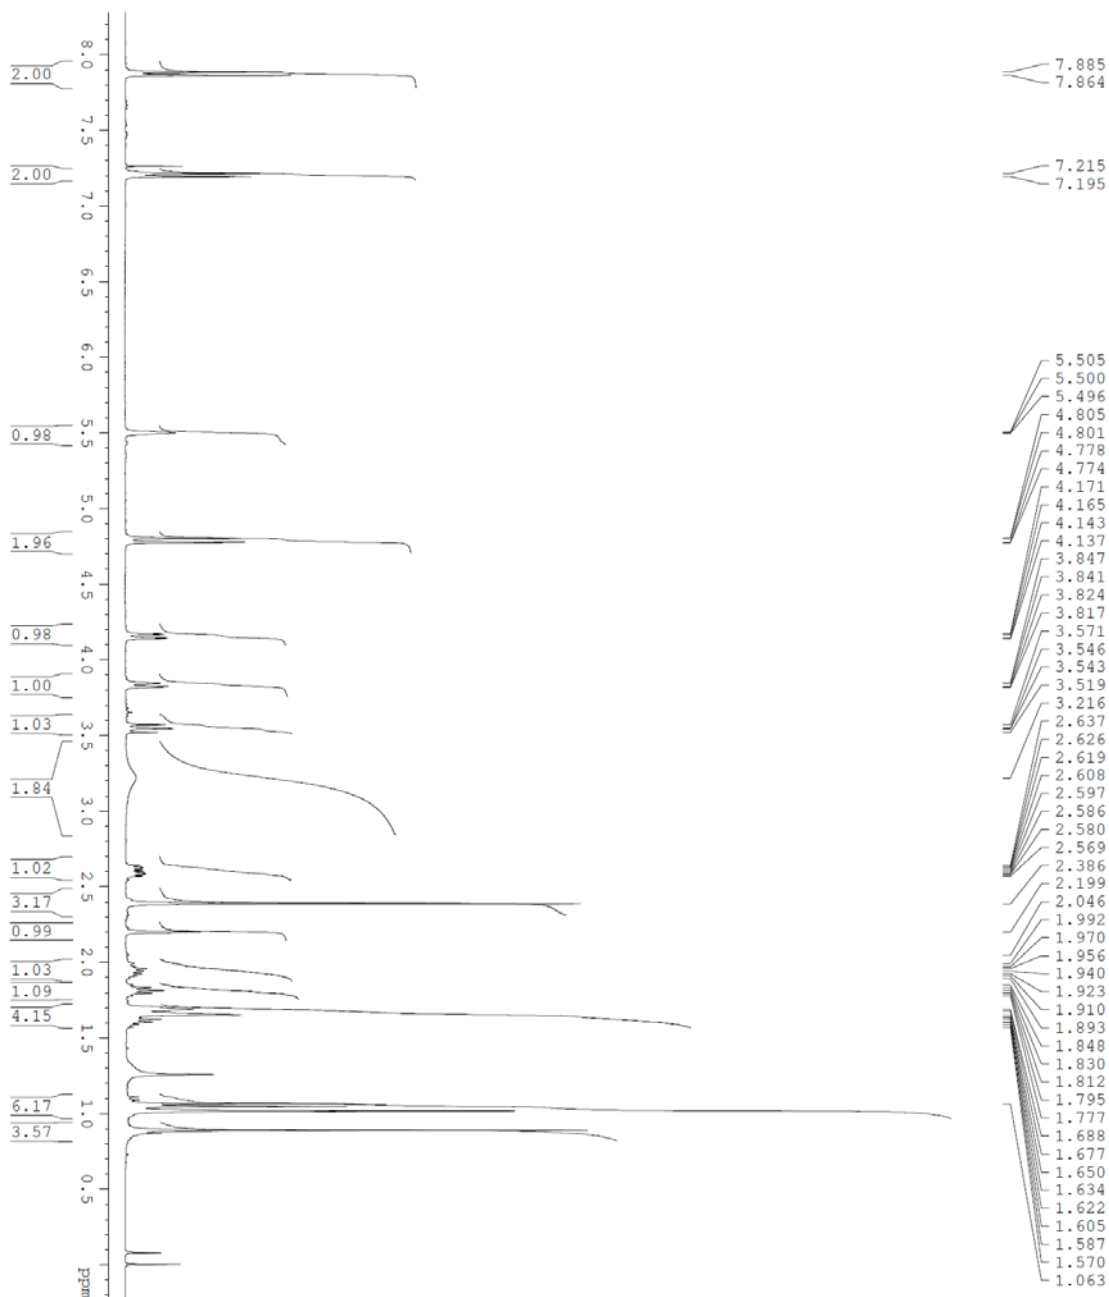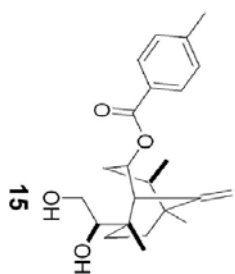

Current Data Parameters  
NAME 081216 d101 Blue  
EXPNO 1  
PROCNO 1  
F2 - Acquisition Parameters  
Date\_ 20081216  
Time 19.13  
INSTRUM spect  
PROBHD 5 mm PABBO BB-  
PULPROG zgpg30  
TD 65536  
SOLVENT CDCl3  
NS 16  
DS 2  
SWH 8223.685 Hz  
FIDRES 0.125483 Hz  
AQ 3.9846387 sec  
RG 64  
RW 60.800 use  
DM 6500 use  
TE 294.4 K  
D1 1.00000000 sec  
TD0 1  
===== CHANNEL f1 =====  
NUC1 1H  
P1 12.00 use  
PL1 12.00 dB  
SFO1 400.1264710 MHz  
F2 - Processing parameters  
SI 32768  
SF 400.130038 MHz  
WDW EM  
SSB 0  
LB 0.30 Hz  
GB 0  
PC 1.00



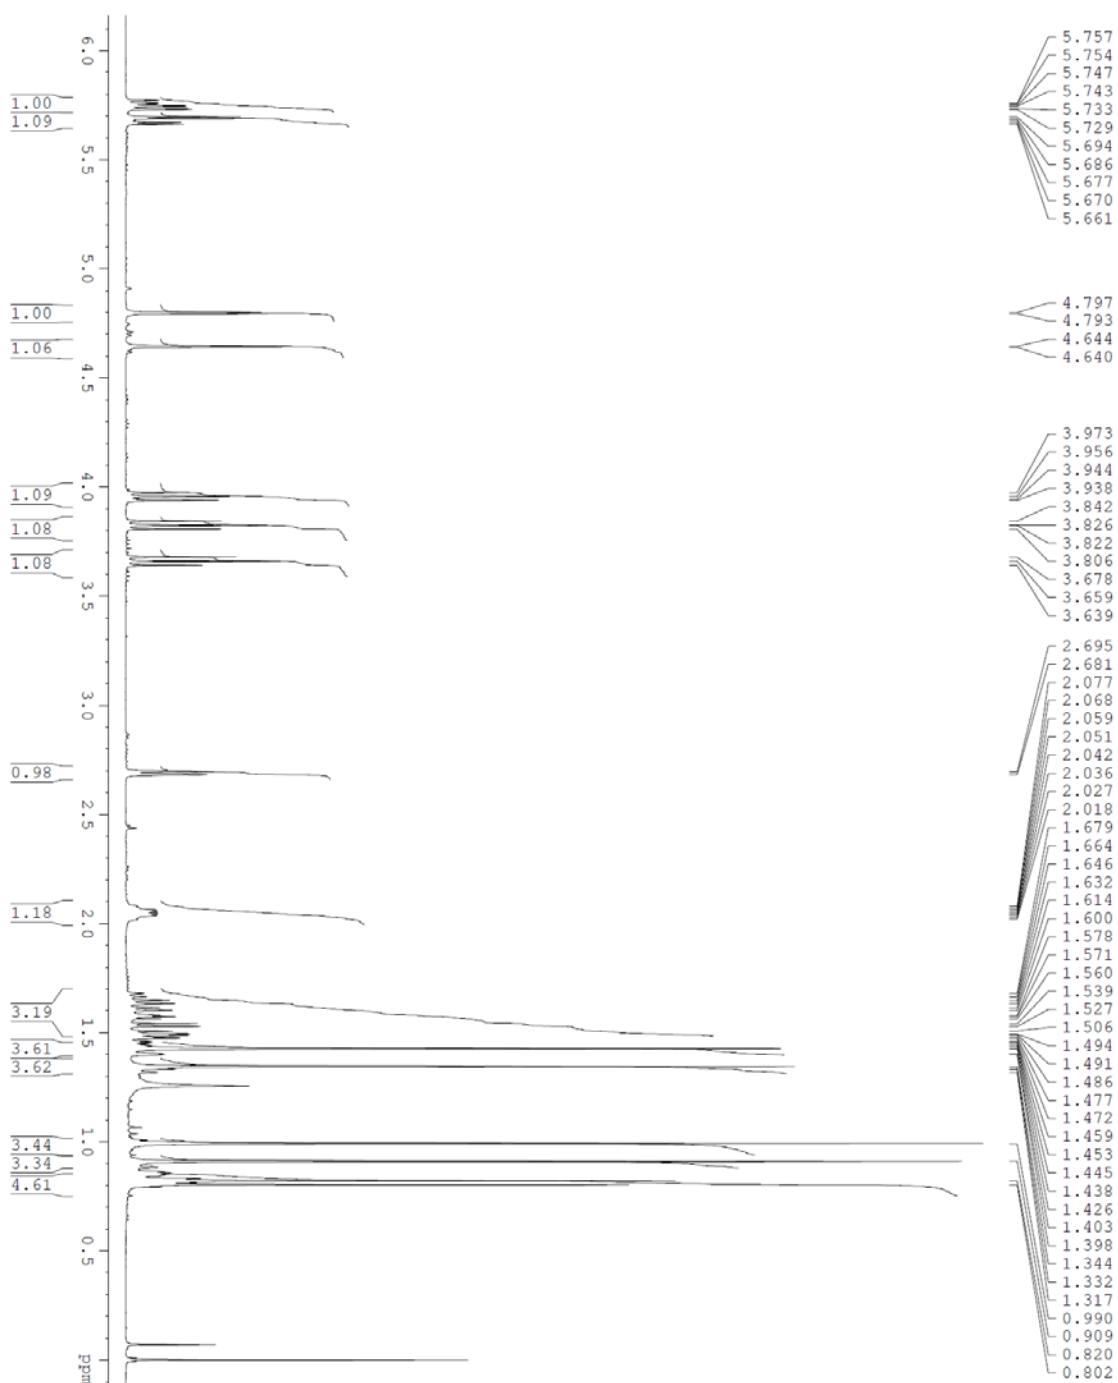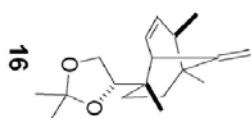

Current Data Parameters  
 NAME 090113 ofline a f  
 EXPR 1  
 PROCNO 1  
 F2 - Acquisition Parameters  
 Date\_ 20090113  
 Time 14.16  
 INSTRUM spect  
 PROBD 5 mm PABBO B9-  
 PULPROG zg30  
 TD 65536  
 SOLVENT CDCl3  
 NS 16  
 DS 2  
 SWH 8223.685 Hz  
 FIDRES 0.125483 Hz  
 AQ 3.984327 sec  
 RG 327.5  
 DW 60.800 usec  
 DE 6.00 usec  
 TE 294.9 K  
 D1 1.00000000 sec  
 TDO 1  
 ===== CHANNEL f1 =====  
 NUC1 1H  
 P1 12.30 usec  
 PL -1.00 dB  
 SFO1 400.1325710 MHz  
 F2 - Processing parameters  
 SI 32768  
 SF 400.130042 MHz  
 SC EX  
 NCM 3  
 ZS 0  
 GB 0  
 PC 1.00

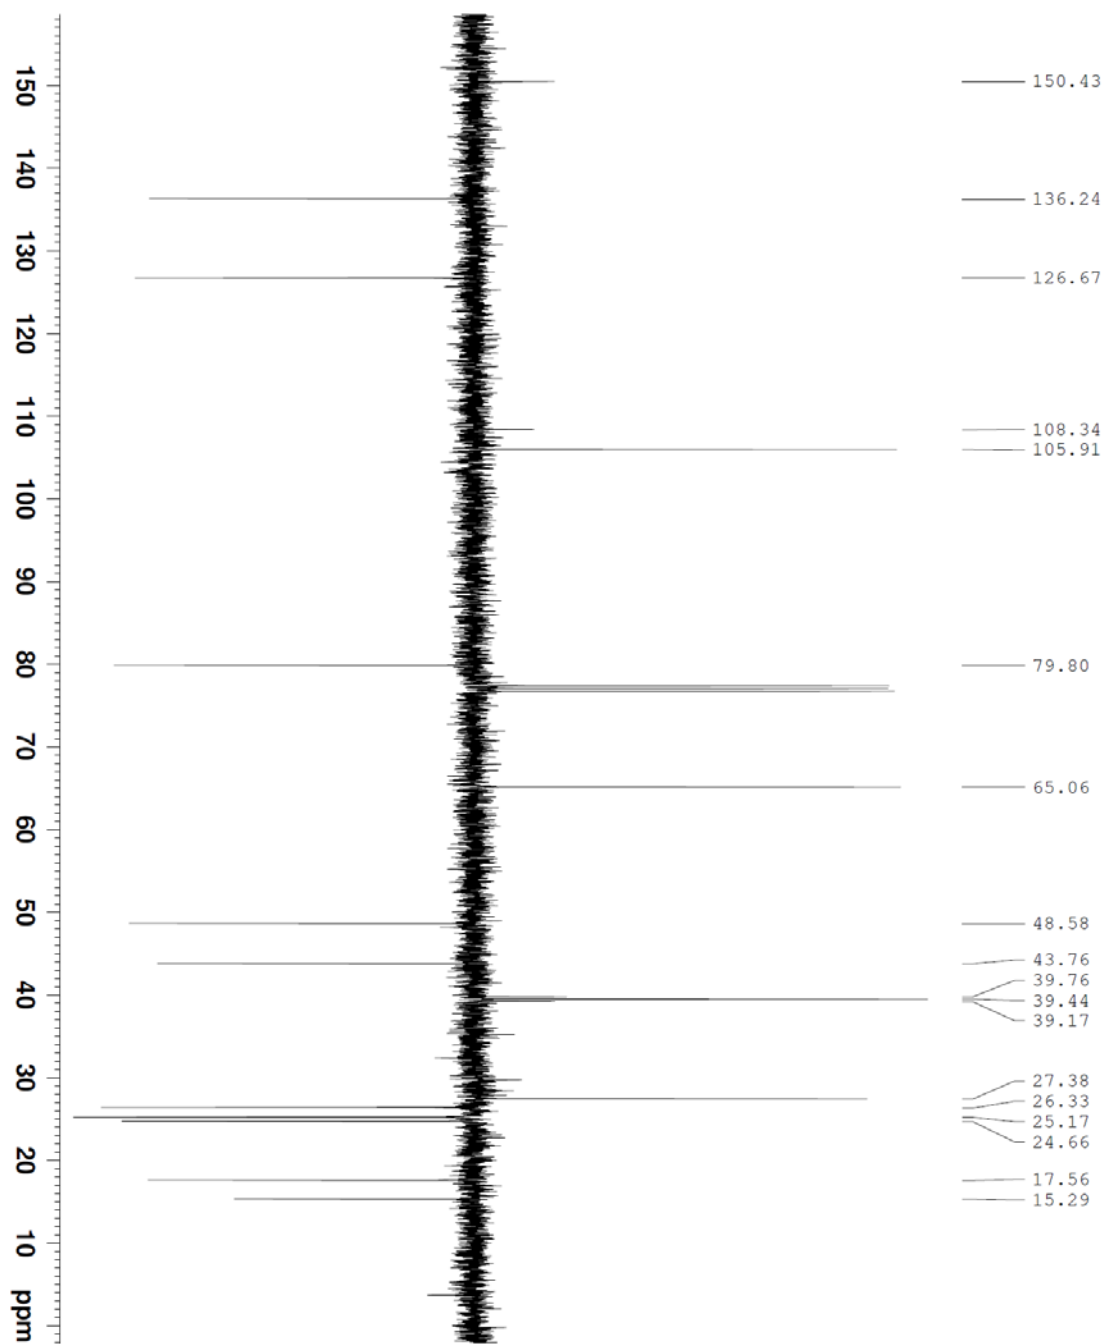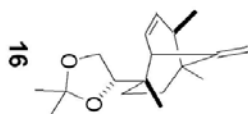

```

===== DATA =====
NAME: 050113_040716 a pure 1ac
EXPNO: 1
PROCNO: 1
F2 - Acquisition Parameters
Date_ 20070714
Time 14:14
INSTRUM spect
PROBHD 5 mm RABBO
PULPROG zgpg30
TD 65536
SFO400
AQ 256
DS 4
FIDRES 24038.445 Hz
AQ 0.366798 sec
NUC1 13C
NUC2 13C
P1 1.563188 sec
DE 20.490 uSARC
DE 6.00 uSARC
RG 327.5
CHRG1 1.0000000 K
CHRG2 145.0000000 sec
DEO 0.00689605 sec
DELTA 0.00001019 sec
===== CHANNEL f1 =====
NUC1 13C
P1 8.00 uSARC
P2 16.00 uSARC
P3 16.00 uSARC
SFO1 100.628299 MHz
===== CHANNEL f2 =====
NAME: 050113_040716
EXPNO: 1
PROCNO: 1
F2 - Processing parameters
SI 1
SF 100.612700 MHz
RG 327.5
CH 1
DE 6.00 uSARC
DEO 0
PC 1.49
  
```



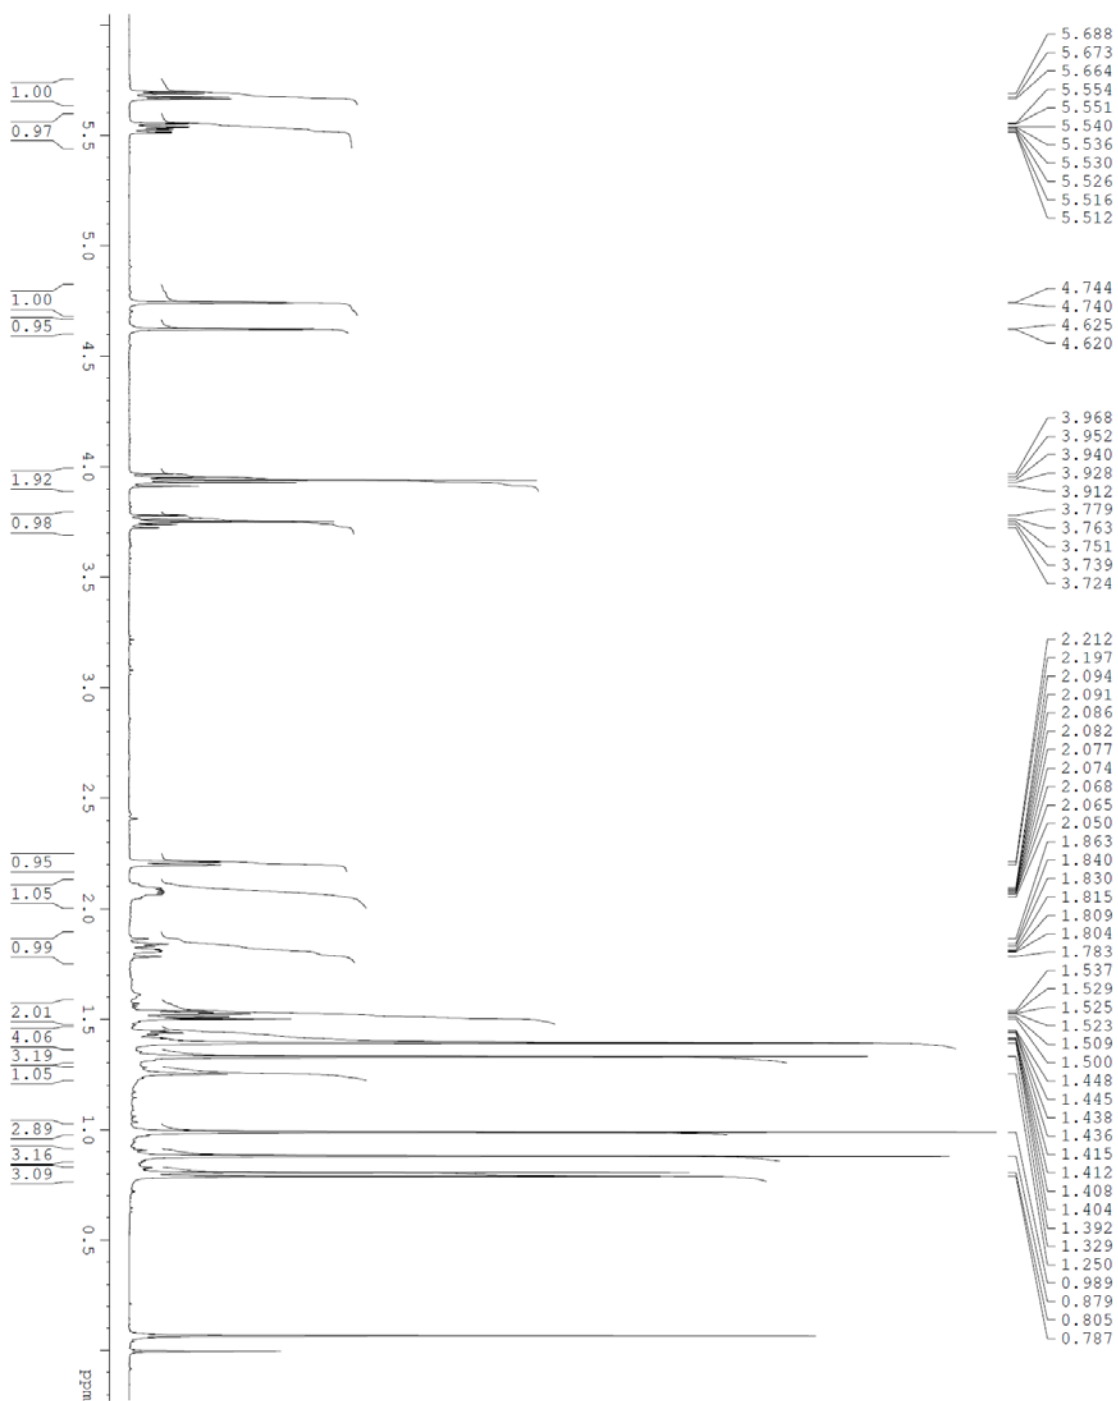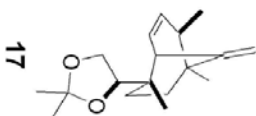

Current Data Parameters  
NAME 090108 elimination pr  
EXPNO 1  
PROCNO 1  
Date\_ 20090108  
F2 - Acquisition Parameters  
Date\_ 11-01-09  
Time 11:45:11  
INSTRUM 5 mm PABO-BB-  
PROBHD 5 mm PABO-BB-  
PULPROG zgpg30  
TD 65536  
SOLVENT CDCl3  
NS 16  
DS 2  
SWH 823.64 Hz  
FIDRES 0.12483 Hz  
AQ 3.984637 sec  
RG 60.00 usec  
DE 6.00 usec  
TE 294.6 K  
TDO 1.000000 sec  
F2 - Processing parameters  
SI 32768  
SF 400.130052 MHz  
WDW EM  
SSB 0  
GB 0.30 Hz  
PC 1.00

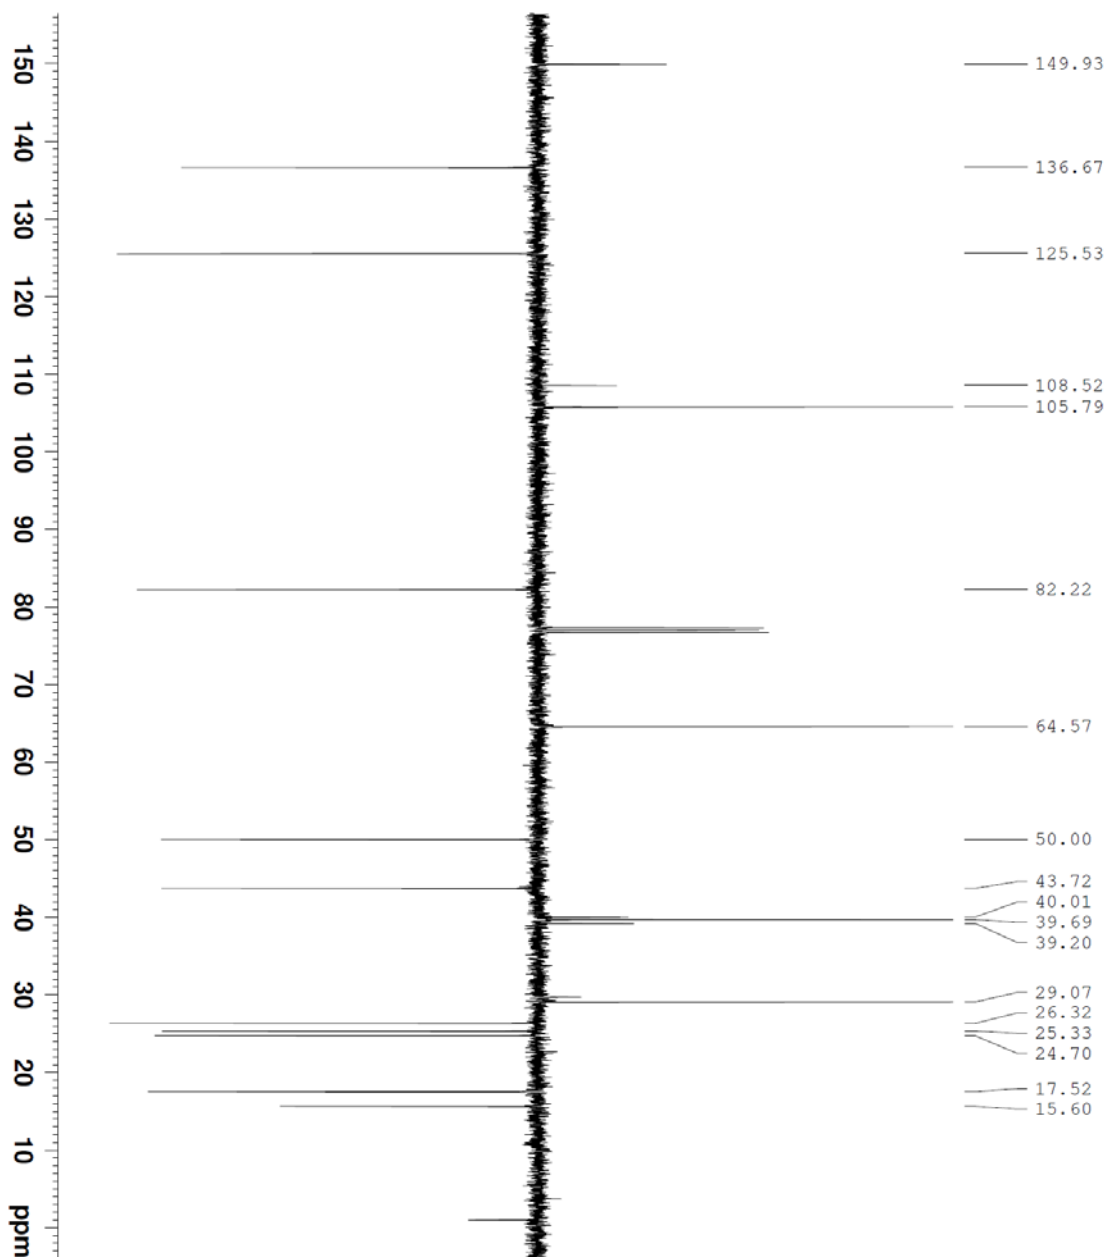

```

Current Data Parameters
NAME          09a108 elimination product b 13c
EXPNO         1
PROCNO        1
F2 - Acquisition Parameters
Date_         20091018
Time          11:06
INSTRUM       spect
PROBHD        5 mm PABBO BB-
PULPROG       zgpg30
TD            65536
SOLVENT       CDCl3
DS            2
AQ            4.00
RG            256
DE            6.00 usec
TE            300.2 K
FIDRES        0.14500000
AQRESZ        1.45000000
D1            2.00000000 sec
d2            0.00685655 sec
DETA          0.0001019 sec
TDO           1
===== CHANNEL f1 =====
NUC1          13C
P1            8.00 usec
PL1           -1.00 dB
PL2           -1.00 dB
SFO1         100.6282828 MHz
===== CHANNEL f2 =====
CPDPRG2       waltz16
NUC2          1H
PCPD2         80.00 usec
PL12          1.26 dB
PL13          -1.00 dB
SFO2         400.110695 MHz
F2 - Processing parameters
SI            32768
SF           100.6127764 MHz
WDW           0
SSB           0
LB            1.00 Hz
GB            0
PC            1.40

```

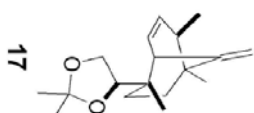



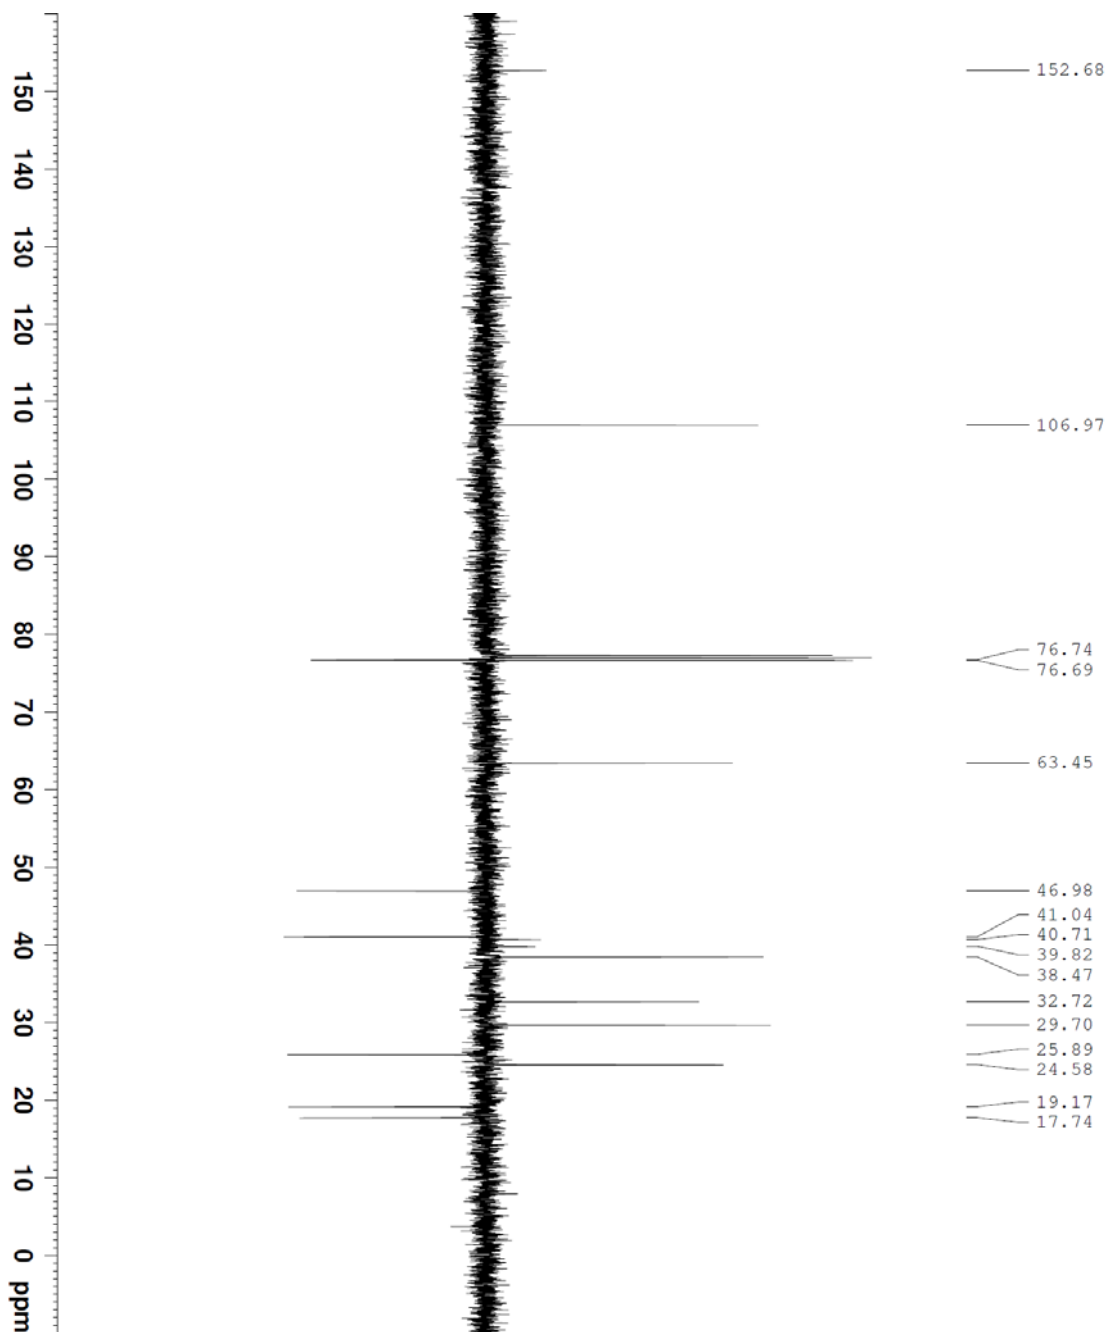

Trifarienol A (1)

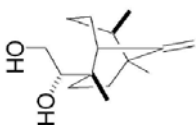

```

Current Data Parameters
EXPNO 1
PROCNO 1
F2 - Acquisition Parameters
DATE_ 20091220
TIME 12.00
INSTRUM spect
PROBHD 5 mm PABBO BB-
PULPROG zgpg30
TD 65536
SOLVENT CDCl3
DE 2
DS 4
SWH 24038.461 Hz
AQ 1.3631968 sec
RG 214400
DE 4.00 usec
TE 298.2 K
FIDRES 1.0000000
AQRES 2.0000000 sec
D1 145.0000000
D2 145.0000000
DELTA 0.0000010 sec
TDO 1
===== CHANNEL f1 =====
NUC1 13C
P1 13.0 usec
PL1 0.00 dB
PR1 18.00 usec
PL2 -1.00 dB
PR2 100.6228298 MHz
===== CHANNEL f2 =====
NUC2 1H
P2 12.00 usec
PL2 0.00 dB
PR2 400.1418603 MHz
F2 - Processing parameters
SI 32768
SF 100.6127650 MHz
WDW EM
SSB 0
GB 1.00 Hz
PC 1.40
  
```

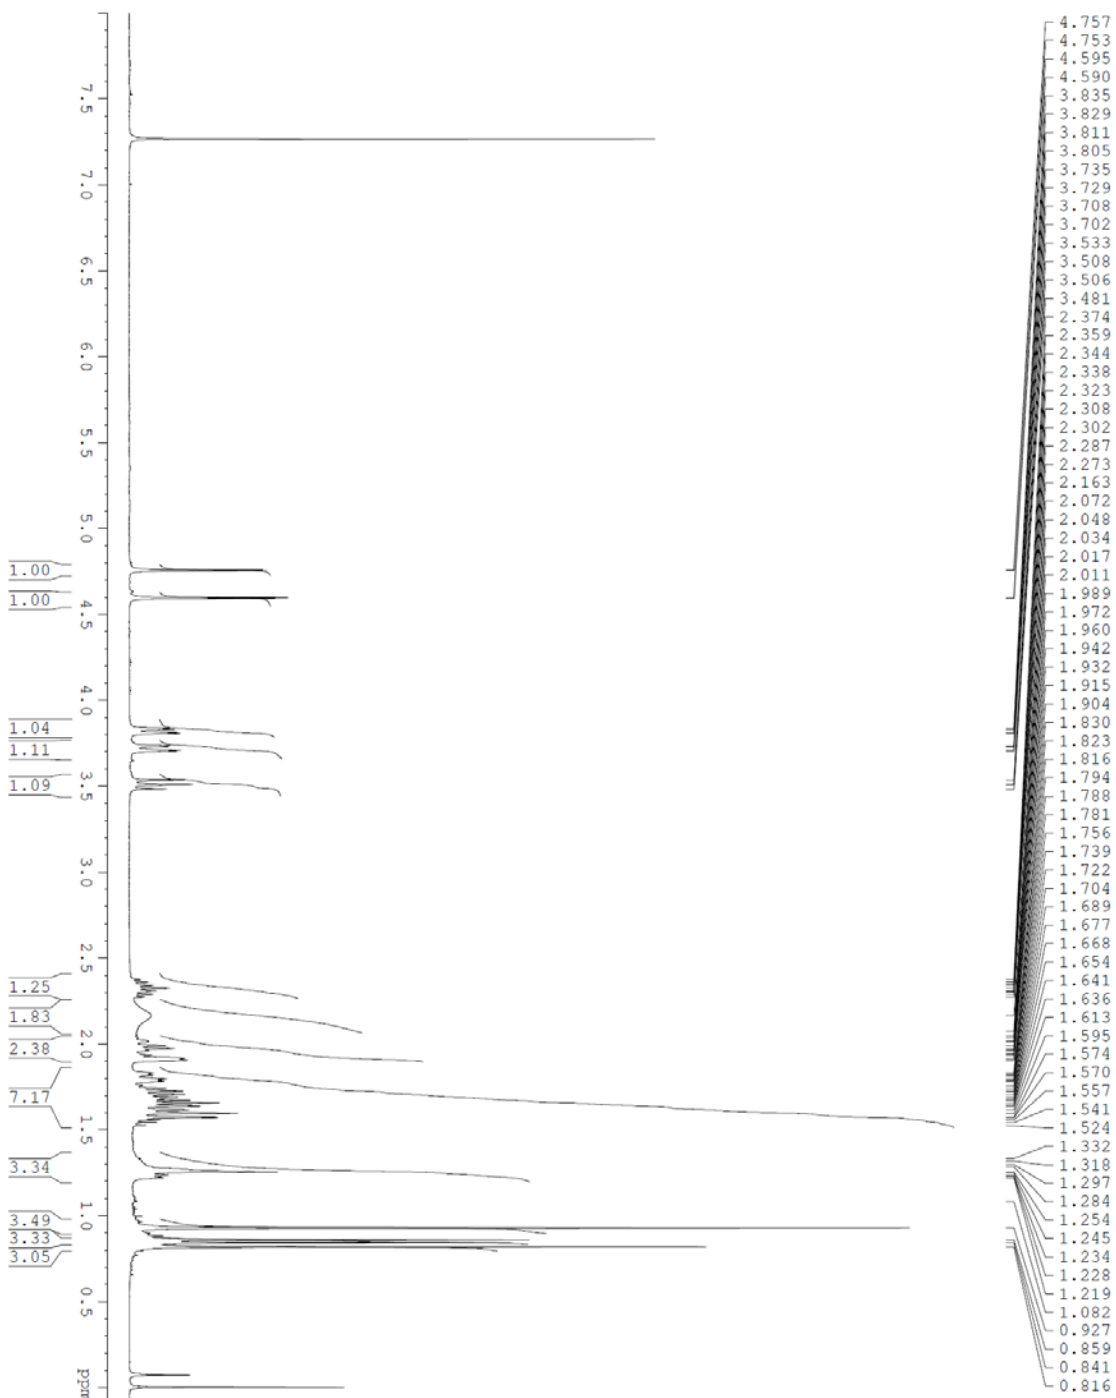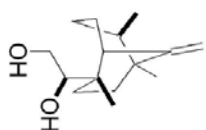

Trifarienol B (2)

Current Data Parameters  
 Name: 070120 trifarienol b  
 ExpNO: 1  
 PROCNO: 1  
 F2 - Acquisition Parameters  
 Date\_: 20090120  
 Time: 10.29  
 Instrument: spect  
 P1: 12.30  
 PRGPROG: 5 mm PABBO S8-  
 PULPROG: zg30  
 TD: 65536  
 SOLVENT: CDCl3  
 NS: 16  
 DS: 2  
 SWH: 8023.685 Hz  
 FWHM: 0.725483 Hz  
 AQ: 3.9846387 sec  
 RG: 161  
 DW: 60.800 usec  
 DE: 6.00 usec  
 TE: 294.7 K  
 D1: 1.00000000 sec  
 ICD: 1  
 CHANNEL f1  
 NUC1: 1H  
 P1: 12.30 usec  
 PL1: -1.00 dB  
 SF01: 400.1324710 MHz  
 F2 - Processing parameters  
 SI: 32768  
 SF: 400.1300033 MHz  
 N1: EM  
 N2: 0  
 SSB: 0  
 LB: 0.30 Hz  
 GB: 0  
 PC: 1.00

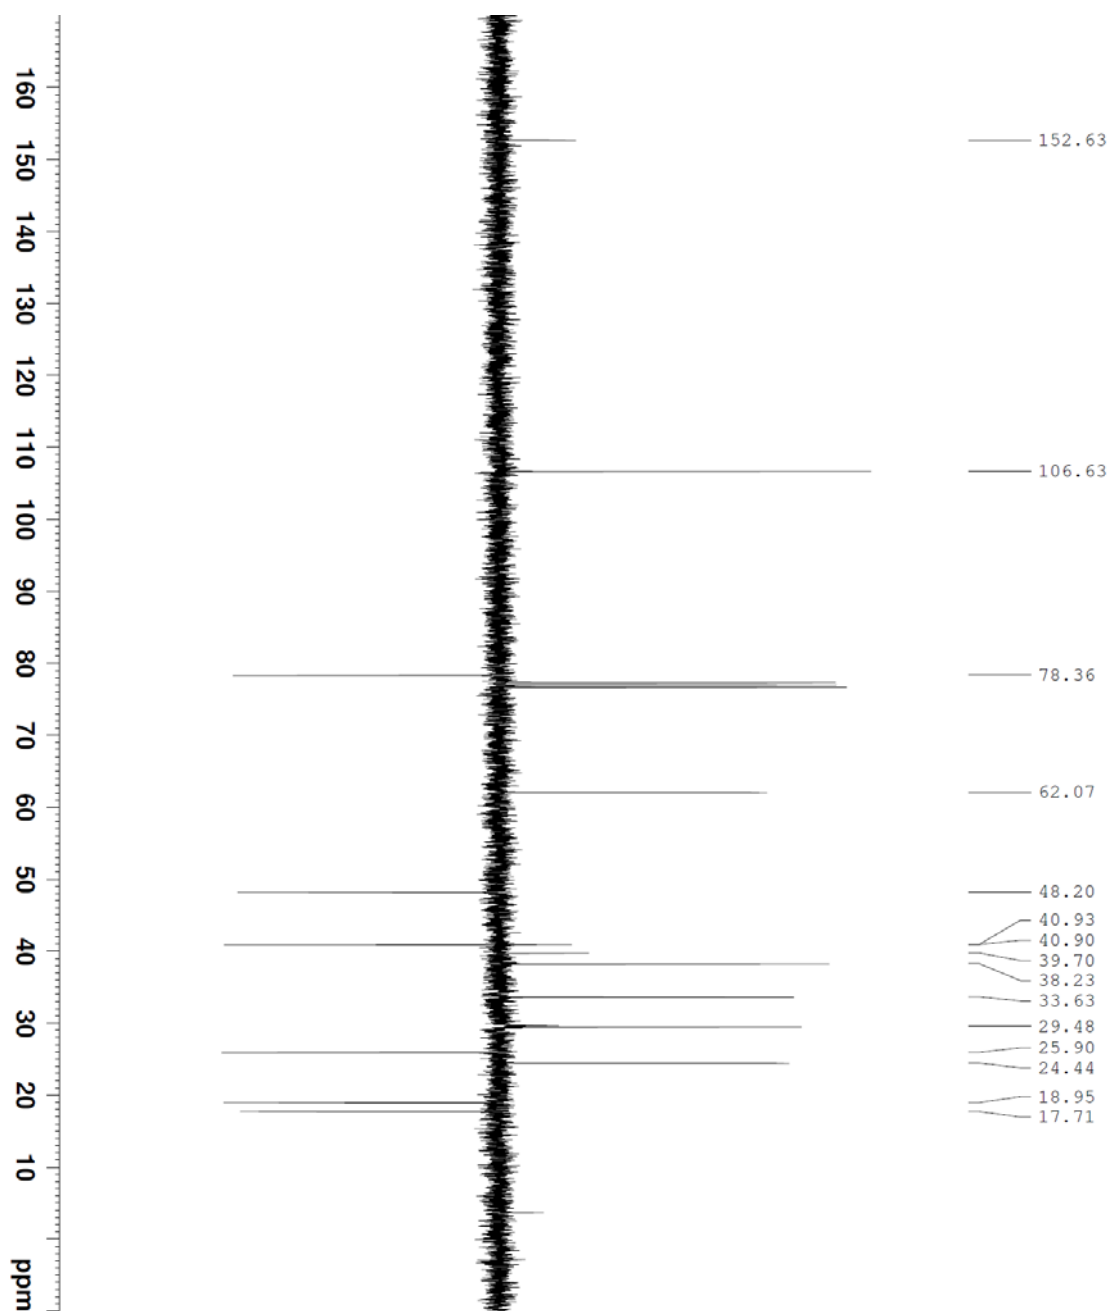

Current Data Parameters  
NAME 090120 Trifarlenol B 13C  
EXPNO 1  
PROCNO 1  
F2 - Acquisition Parameters  
Date\_ 20090220  
Time 10.47  
INSTRUM spect  
PROBHD 5 mm PABBO 1H-  
PULPROG zgpg30  
AQ 6.00  
SOLVENT CDCl3  
NS 256  
DS 4  
SWH 24031.461 Hz  
FIDRES 0.36799 Hz  
AQ 1.316400 sec  
RG 64.000  
CW 20.000 usec  
TE 295.2 K  
T2 295.7 usec  
CHSE11 1.000000  
CHSE12 1.000000  
D1 1.5000000 sec  
D11 0.0000000 sec  
DELTA 0.0001019 sec  
DELTA 1  
===== CHANNEL f1 13C =====  
NUC1 P1 13C  
P1 16.00 usec  
PL1 0.00 dB  
NUC2 P2 13C  
P2 16.00 usec  
PL2 0.00 dB  
SFO1 100.628299 MHz  
===== CHANNEL f2 1H =====  
NUC3 P3 1H  
P3 12.00 usec  
PL3 0.00 dB  
SFO2 400.146000 MHz  
===== CHANNEL f3 1H =====  
NUC4 P4 1H  
P4 12.00 usec  
PL4 0.00 dB  
SFO3 400.146000 MHz  
F2 - Processing parameters  
SI 32768  
SF 100.617005 MHz  
WDW EM  
SSB 0  
LB 1.00 Hz  
GB 0  
PC 1.40

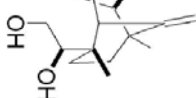

Trifarlenol B (2)
